# Supplementary material for: Multi-factor regulatory network and different clusters in hypertrophic obstructive cardiomyopathy
Source: BMC Med Genomics. 2021 Aug 6;14:199. doi: 10.1186/s12920-021-01036-4 (PMC8348869; doi:10.1186/s12920-021-01036-4)
Supplement: Supplementary file 5 — Additional file 5: Table S4. Candidate genes and gene expression values for WGCNA. The details in supplementary materials. [file 12920_2021_1036_MOESM5_ESM.xlsx]

## Sheet: WGCNA_dataExp
AR	C6	F8	FH	MB	NP	POLR2A	POLR3B	CCDC109B	UQCRFS1	OTUD5	OTUD1	FRMD3	FRMD5	HIBADH	ACE	ADC	ADK	AGK	AGL	AGT	APP	AXL	BOC	C1R	BSG	CA3	CBL	CD9	CEL	CFD	CIC	CKB	CKM	DES	DLD	DSP	SLITRK4	EGF	F2R	ERG	FAH	FAP	FES	FGR	FN1	FOS	FRK	FRY	FXN
GSM907203	6.73785	7.60965	6.50806	12.1579	13.9932	7.25456	9.37477	8.34639	7.60395	13.6147	6.15957	7.70199	8.86629	8.88957	10.6757	6.06762	6.48055	7.56808	9.27828	8.48326	8.95181	9.47504	7.91207	6.23491	6.70806	11.3183	6.5124	6.72307	7.73751	6.49778	9.63725	7.44628	10.1402	14.3393	13.4609	11.5472	9.0697	8.14263	6.52732	13.8258	6.11406	7.32611	7.52081	7.72059	6.56704	6.08557	6.83546	6.14119	8.15286
GSM907204	6.51143	8.14006	6.4982	11.9453	13.8675	7.2192	9.70769	8.29575	8.22104	12.4793	6.54099	8.02586	9.17424	8.73007	10.8378	6.20021	7.12673	7.15677	8.73294	8.10233	8.89021	8.94803	7.84673	6.48299	6.24503	11.5487	6.3565	6.95642	7.28255	6.37567	10.5191	7.5561	10.118	14.7649	14.1045	9.47575	8.36545	7.76915	6.48393	13.866	6.19428	7.47641	7.56381	7.85486	6.23746	6.11239	7.78761	6.68187	7.36488
GSM907205	6.52617	8.77929	6.96021	11.4686	13.8895	7.0778	9.45541	8.30166	7.66967	13.5379	6.12656	8.01417	8.86301	8.9236	11.1382	5.91056	6.64694	7.88394	9.39906	8.18001	8.65471	10.3026	7.8083	6.22617	7.20483	10.8564	7.16074	6.44292	7.77054	6.64532	11.7116	7.29266	9.21653	14.5789	13.1888	10.5768	8.70492	6.94772	6.30383	13.8165	6.11014	7.48425	7.85239	7.30572	6.40489	6.06341	6.4474	6.70185	7.73592
GSM907206	7.02201	8.36133	6.67149	11.8042	14.0555	6.94382	9.51553	8.04398	7.77098	13.4419	6.41724	7.76921	8.93002	9.08686	10.2988	6.10559	6.70307	7.53206	8.96437	8.48674	8.97573	9.5929	7.69886	6.05259	6.78185	11.2238	6.92557	6.60152	8.07159	6.43876	9.32974	7.33023	8.08364	13.9996	12.8819	11.2271	8.99964	7.61561	6.39227	13.4206	6.07057	6.94238	6.84509	7.48484	6.6715	6.19197	6.46475	6.53787	8.12898
GSM907207	6.7341	8.02041	6.4702	11.9375	13.9781	7.11013	10.1187	8.64617	7.53756	13.3925	6.95741	7.93905	8.71949	8.55093	10.8077	5.88633	6.76565	7.13813	8.71493	8.29334	8.91048	9.64201	7.71711	6.43715	6.37437	11.8698	7.22992	6.80133	7.28358	6.8793	9.14949	7.50277	10.0847	14.3351	13.9836	10.1081	8.82362	7.15655	6.25373	13.7756	6.21802	7.41226	7.13306	7.37866	6.79126	6.14023	6.94984	6.4667	7.77463
GSM907208	6.69087	7.48722	6.64168	11.3531	13.886	7.45925	9.42809	8.67676	8.48726	13.5838	6.63008	7.95583	9.09728	8.81385	10.6979	5.99296	6.57842	7.32357	9.13257	7.78489	8.55999	10.0004	8.30709	5.90374	7.32392	11.061	8.391	6.7372	8.29257	6.51509	10.2485	7.38515	9.77713	14.1574	13.518	10.3082	8.71413	9.16982	6.62173	13.6011	6.22679	7.247	8.02362	7.36088	6.62358	6.26184	7.2787	6.6492	7.75
GSM907209	6.66962	8.60966	6.63627	12.0934	13.4885	7.13588	9.45035	8.68018	7.78627	13.4264	6.51506	9.53564	8.76419	8.58121	10.635	6.11069	6.58823	7.73577	9.02169	8.62366	8.92303	9.25019	8.04312	6.40015	6.69751	11.1854	6.10654	6.66329	7.65601	6.22619	9.83265	7.0862	10.2109	14.514	13.4291	10.9431	9.04435	8.28022	6.74432	13.1925	6.22826	7.74993	7.28656	7.18744	6.49394	6.11749	11.3433	6.79747	7.59656
GSM907210	6.30008	7.41968	6.4177	10.8351	13.8405	7.84164	10.1376	8.56183	8.32779	13.2029	6.56908	7.99187	8.61388	8.65476	10.9581	6.05773	7.01255	7.34801	8.57997	7.5118	8.74897	9.59303	8.497	6.44688	6.94983	11.3861	10.4035	6.88713	8.36179	6.34749	10.298	7.44929	9.58312	14.1353	14.0414	9.6658	8.25738	10.6189	6.43021	13.6817	6.227	6.82459	8.30878	7.43665	6.5018	6.05108	8.4926	6.47241	7.1039
GSM907211	6.83157	8.58285	6.78472	11.5519	13.6908	6.63864	9.14645	8.61453	7.56708	13.5224	6.59339	7.81443	8.75988	8.84794	10.7267	6.00419	6.61929	7.67347	9.48066	7.79095	9.19519	9.9028	7.57008	6.17027	6.8174	11.7086	6.24203	6.54675	7.8805	7.1251	11.9	7.40167	10.4328	14.415	13.2334	10.7495	9.09387	6.67041	6.40138	13.2231	6.11864	7.0936	6.47711	7.32302	6.68849	5.98048	8.75638	6.47258	7.14909
GSM907212	7.07185	9.12767	6.68828	12.0191	13.415	6.68693	9.39069	8.42794	7.91453	13.4245	6.65165	9.17217	8.70579	8.70392	10.3948	6.02012	6.46536	7.48949	8.94385	8.52005	8.86436	9.6407	7.71258	6.09826	7.12204	10.8502	7.43861	6.75143	8.1352	6.20853	10.8747	7.50612	9.46311	14.2674	13.3451	11.2943	9.32914	7.49904	6.583	13.1112	6.21047	7.67391	6.7456	7.32372	7.30704	6.11195	8.34237	7.00273	7.75406
GSM907213	6.88814	7.93633	6.57304	11.7554	13.3426	7.15767	9.44564	8.44828	7.53807	13.3749	6.65454	7.9477	9.41897	8.48245	10.6086	6.24936	6.51949	7.63078	9.06075	8.3567	9.02245	9.44957	7.25941	6.31608	6.08382	11.0484	5.91007	6.76394	8.27813	6.5351	8.26696	7.11062	9.29186	14.2488	13.2781	10.9429	8.81051	9.10696	6.62603	12.984	6.22522	7.80817	6.84919	7.49726	6.60114	6.04155	6.02837	6.44515	8.03137
GSM907214	6.70121	10.5199	6.86374	12.0264	14.199	7.00058	9.45394	8.59979	7.81825	13.9597	6.15438	7.96301	8.784	8.53552	10.8519	6.17165	6.24062	8.04357	9.30802	8.58032	9.14046	9.31986	7.60146	6.13125	6.53102	11.2586	6.54669	6.67264	7.49087	7.01358	9.84687	7.2599	10.3813	14.6965	13.1864	11.3198	9.37449	7.32666	6.7345	13.7666	6.1741	7.67414	6.76266	7.35077	6.4119	6.09229	6.85149	6.37881	7.58417
GSM907215	6.71833	8.73664	6.56409	11.672	13.8051	6.87379	8.80567	8.38331	7.17859	13.1169	6.59494	8.52798	9.0019	9.27551	10.4474	5.90822	6.69022	7.44032	8.90555	8.00196	9.00482	9.48517	7.92741	6.10033	6.61517	11.1788	8.26674	6.92356	7.69252	6.04298	10.4642	7.49187	9.33503	14.0209	13.6093	10.698	9.37495	7.73086	6.65557	13.5019	6.05838	7.63723	7.08174	7.00733	6.42024	5.89603	7.10016	6.1846	8.45322
GSM907216	7.14366	10.34	6.45285	11.7848	13.2964	6.40996	9.68751	8.29572	7.70326	13.3651	6.46097	7.97997	9.04112	8.56896	10.3931	6.19971	7.0329	7.55999	8.85281	8.29502	8.83349	9.40733	7.49859	6.16584	6.61685	11.6016	5.88721	6.97732	7.90368	6.39289	9.53614	7.41582	10.3248	14.3729	13.1153	11.0501	9.50131	7.72929	6.72074	13.1491	6.24559	7.65132	7.21123	6.93974	6.45279	6.28918	6.87062	6.3787	7.72701
GSM907217	6.68101	8.30502	6.5739	12.3672	13.5431	6.94746	9.19045	8.19031	7.56286	13.5998	6.24138	8.87434	8.54866	8.89793	10.9568	6.11188	6.44521	7.64475	9.39232	8.38961	8.41934	9.28638	7.44202	5.78122	6.31452	11.1315	6.36261	6.43	7.37993	6.85376	8.40469	7.13248	9.17489	14.366	12.9446	10.8566	8.99992	8.96652	6.49491	13.7765	6.22092	6.92587	6.79525	7.1051	6.334	6.11221	6.88585	6.41098	8.26746
GSM907218	6.59754	9.15736	6.65206	12.1425	13.7815	6.91514	9.10555	8.55655	7.43158	13.5663	6.40046	7.98226	8.68289	9.0954	10.7437	6.07867	6.67322	7.8113	9.33329	8.22444	8.93443	9.80586	7.82881	6.12756	6.52081	11.179	7.24278	6.40204	7.70223	6.53318	10.0999	7.19581	9.80137	14.2625	13.1824	10.7868	8.99235	7.90381	6.50902	13.5538	6.25098	7.23585	6.33937	6.96508	6.50261	6.08295	6.39149	6.4856	7.78269
GSM907219	6.76575	10.1839	6.54181	12.262	13.7934	7.14315	9.54064	8.47853	7.84523	13.6332	6.03545	8.51689	8.89736	8.54191	10.5544	6.26659	6.76093	7.81464	8.93171	8.61254	8.70785	9.61641	7.85172	6.25648	6.67341	11.051	6.59154	6.53562	7.43175	6.7962	10.0339	7.41017	9.93567	14.3645	13.4422	10.9944	8.95478	7.82376	6.54209	13.5365	6.14483	7.61246	6.99124	7.20725	6.53607	6.11901	6.50992	6.55004	7.2051
GSM907220	6.35947	7.73616	6.52598	12.2967	14.1135	7.03581	9.51419	8.39558	8.03788	13.8452	6.25866	8.02489	8.86724	8.7514	10.5639	6.14211	6.62869	7.74577	9.01265	8.09274	8.72458	9.00752	7.91317	6.11268	6.74227	11.0738	10.5769	6.54696	7.87816	6.69266	10.2447	7.2015	10.5426	14.4718	13.2995	11.2478	8.94078	8.28179	6.41113	13.5661	6.12622	7.73832	7.01879	7.22325	6.49393	6.1514	6.72704	6.59938	7.22753
GSM907221	6.83267	9.06782	6.59079	11.9093	13.5635	6.67796	9.41587	8.67067	7.98374	13.2904	6.5388	8.29999	9.30204	8.53801	10.4752	6.04869	6.91218	7.19459	8.88796	8.25326	8.77444	9.60282	7.93203	6.19293	6.83464	11.1312	7.34683	6.57861	8.29089	6.41453	10.6123	7.36309	9.6874	14.2235	13.3852	10.9146	8.95122	8.61772	6.39862	13.1974	5.94593	7.71325	7.63553	7.11011	6.31239	6.3025	6.77198	6.53182	7.81657
GSM907222	6.61777	7.1463	6.45732	11.9979	13.9146	6.95306	9.45321	8.44074	8.05287	13.5197	6.67665	8.9935	9.19913	8.97467	10.3436	6.12973	6.79047	7.34848	9.12937	8.7664	8.71243	9.35107	7.83402	6.23978	6.57368	11.0469	7.71105	6.46647	7.79676	6.31607	9.89008	7.09669	9.54355	14.1681	13.2551	11.1517	8.95282	8.97893	6.2843	13.5745	6.17321	7.31444	7.07212	7.26469	6.57545	6.0317	6.85738	6.46226	7.64394
GSM907223	6.5358	7.89472	6.82822	11.8682	14.0041	7.12875	9.89131	8.23483	7.98304	13.2943	6.07425	8.34012	9.4679	8.49559	11.0696	6.24726	6.72714	7.59588	9.22439	8.32022	9.55088	9.83519	8.00992	6.20189	6.57956	11.0297	9.04682	6.47887	8.04852	6.41312	10.4403	7.28683	10.4299	14.6771	13.691	10.42	9.06254	8.77629	6.36147	13.92	6.15699	7.12545	7.82566	7.09936	6.29802	6.17551	7.97	6.60133	8.2306
GSM907224	6.50378	9.39656	6.77417	11.4973	13.7692	6.75644	9.36545	8.25854	7.94413	13.291	6.54917	8.77832	9.54474	8.17304	10.6387	5.98238	6.74153	7.39612	9.00032	8.12656	9.10534	10.1688	8.38189	6.22023	6.7883	10.9623	8.76266	6.52198	8.41649	6.17913	11.579	7.44149	9.2409	13.7053	13.2511	10.3922	8.98164	8.11885	6.38826	13.5076	6.26888	7.3019	7.37977	7.08895	6.59246	5.89075	8.43138	6.66524	7.86221
GSM907225	6.4869	8.77099	6.58753	12.0498	13.6083	7.16322	9.39179	8.40909	7.96912	13.4604	6.20912	8.46017	9.0849	8.88333	10.7482	6.10031	6.84084	7.72627	9.25558	7.90213	8.8792	9.43053	8.05479	6.50669	6.53108	11.1684	7.6937	6.65597	7.61546	6.62733	10.0085	7.18	9.69605	14.0801	13.2445	10.6896	8.85699	7.82579	6.68939	13.6872	6.28026	7.4189	8.01875	6.81265	6.36488	6.0804	7.14347	6.14985	7.96236
GSM907226	6.9972	6.93871	6.5279	11.7831	13.4489	7.15019	9.63202	8.26525	7.69181	13.6041	6.69045	8.10079	9.1844	8.52237	10.4609	6.21085	6.51842	7.28458	9.16218	8.03309	9.12764	9.98532	7.52286	6.11787	6.58669	11.0813	7.75093	7.06846	7.93291	6.30125	9.95311	7.46857	9.18835	13.9266	13.2321	10.6712	8.85761	9.32409	6.23927	13.5573	6.03747	7.733	7.18839	7.28972	6.63642	6.14819	6.09943	6.39237	7.46736
GSM907227	6.52501	10.0225	6.81413	11.288	14.4252	7.21805	9.95377	8.24891	8.2599	13.8623	6.56165	7.7931	8.68511	8.87369	11.1284	6.06825	6.37169	7.74245	9.02632	7.84056	9.28335	9.00944	8.36212	6.31068	6.88329	11.3435	7.09518	6.43794	8.05801	6.6081	10.0494	7.07138	11.1907	14.588	14.0503	10.6064	8.8957	8.23687	6.59229	13.7747	6.18892	7.44192	7.69303	7.31857	6.66465	6.14337	6.57597	6.53869	7.47976
GSM907228	6.56122	10.0608	6.72446	11.3256	14.0468	6.71144	9.84529	8.43661	7.62025	13.5267	6.84896	7.7984	8.57974	8.77128	11.0259	6.00371	6.54565	7.67642	8.96379	7.84834	9.06116	9.11709	7.91942	6.18518	6.82096	11.5388	8.64291	6.56311	7.94769	6.52167	10.421	7.46826	10.9167	14.4238	13.7699	10.3501	8.63456	8.17807	6.73556	13.6389	6.18121	7.8581	7.44277	6.9679	6.38242	5.97332	8.09095	6.40886	7.88178
GSM907229	6.56838	7.19657	6.63114	12.1523	14.0633	7.16419	9.51986	8.19502	7.49124	12.8115	6.26204	7.98184	9.49852	8.73869	10.6654	6.13838	6.72197	7.47685	8.88938	7.98091	8.6015	8.76845	7.82592	6.34847	6.46149	11.7658	6.92454	6.70097	7.11048	6.74316	10.3853	7.48579	10.3227	14.4461	14.5658	9.90638	9.2763	8.97322	6.28358	14.3369	6.20405	7.54275	7.03733	7.18661	6.61375	6.16014	8.15778	6.39983	7.48838
GSM907230	6.72785	8.59356	6.78461	11.3475	13.8361	7.33774	10.3438	8.70219	7.45623	13.4655	6.57153	8.09294	8.70597	8.70539	11.0417	6.10177	6.79429	7.54699	9.15853	8.10137	8.76484	9.44775	8.2795	6.29105	6.56974	12.2499	7.55578	6.85792	7.67081	6.66949	10.5257	7.30066	10.2951	14.6398	14.2456	10.1665	8.5913	8.3378	6.52798	13.4297	6.24139	7.70184	7.51887	6.992	6.38969	6.09969	6.91931	6.41151	7.48795
GSM907231	6.75375	8.72087	6.76816	12.0461	13.6312	6.88347	9.51002	8.41734	8.17411	13.1152	6.49145	8.92159	9.38355	8.77873	10.6919	6.08673	7.21267	7.38655	8.58899	8.34401	9.0814	9.35741	7.7101	6.34757	6.64916	11.2428	7.84445	6.56499	7.7877	6.10383	10.2201	7.52018	10.5719	14.0229	13.6275	10.7416	8.79341	9.23015	6.80923	13.2522	6.12845	7.83696	7.03041	7.39761	6.55031	6.12387	8.49254	6.71845	8.16006
GSM907232	6.62953	7.29603	6.54526	11.5137	13.493	8.03146	10.0548	8.90222	8.55434	13.6115	6.31188	8.1015	9.43608	8.67549	10.7409	6.09091	6.47786	7.47606	8.84699	8.02058	8.93767	9.82124	7.7845	6.02297	6.95899	10.2479	8.36087	6.66543	8.488	6.31833	10.7912	7.27059	9.93506	14.1815	13.2527	10.2488	8.83799	9.66569	6.50293	13.2937	6.18498	7.65819	7.93966	7.18471	6.69942	6.09163	7.04398	6.67351	7.21057
GSM907233	6.52933	8.55072	6.6379	12.1372	13.6237	7.19419	9.18798	8.39596	8.05042	13.286	6.37608	8.55362	8.68917	8.3229	10.5238	6.07657	6.65657	7.54694	9.14103	8.27868	8.81329	9.42632	8.25939	6.33862	6.45829	11.1501	10.2835	6.53019	7.85395	6.43912	10.4605	7.07505	10.285	13.9968	13.6146	10.7639	8.87257	9.50548	6.44965	13.514	6.21017	7.66755	7.95394	7.00521	6.49875	6.06036	6.62972	6.67512	7.95148
GSM907234	6.87928	8.17038	6.39489	11.8805	13.4162	6.60207	9.62193	8.391	7.67272	13.2082	6.665	8.13605	8.99645	8.88419	10.5153	6.07539	7.2771	7.58853	8.86683	8.50088	8.54433	9.28565	7.98046	6.42884	6.1652	10.944	8.38021	6.59765	7.49447	6.39503	10.9657	7.46008	10.0395	14.0644	13.4065	10.5926	8.90882	9.31314	6.4707	13.2989	6.1302	7.60402	7.11899	7.18802	6.54067	6.01277	6.44609	6.38108	8.33632
GSM907235	6.78757	9.46199	6.61927	11.953	14.0078	6.76161	9.49286	8.41418	7.49242	13.5311	6.42285	8.04096	9.0897	8.49076	10.5648	6.01945	6.78079	7.92965	8.95317	8.37949	8.63174	9.70038	7.67405	5.96454	6.39875	11.0695	6.62165	6.57969	7.6742	6.7629	8.60976	7.13748	10.3865	14.4454	13.5517	10.9925	9.8823	7.7712	6.60641	13.532	6.34606	7.19203	7.58477	7.11598	6.32751	6.08208	6.71543	6.28219	7.7021
GSM907236	6.57449	7.84765	6.79232	11.369	13.8568	7.20021	9.65506	8.29322	7.9966	13.5566	6.26304	7.88097	9.43555	8.73072	10.7417	6.21715	6.77286	7.52933	9.02501	7.6886	8.91938	10.5446	8.31666	6.19993	6.80558	11.2307	8.43748	6.71498	8.2126	6.21673	9.77079	7.0082	9.76275	14.2861	13.8284	10.2565	8.6102	9.14688	6.7539	13.7664	6.28715	7.19194	8.04478	7.52232	6.42305	6.13866	7.36543	6.40467	7.57588
GSM907237	6.73282	11.5154	6.90309	12.4103	14.0699	7.08681	9.49379	8.39175	7.46772	13.7084	6.28926	7.9622	8.51272	8.36208	10.8214	6.20129	6.32923	7.68045	9.48232	8.65994	8.67507	9.82805	7.51622	6.1936	6.48555	11.3216	6.8348	6.54534	7.3954	6.91314	10.4839	7.10195	10.2425	14.6827	12.9961	11.1395	9.36687	7.02054	6.59039	13.7807	6.27201	7.57496	6.45373	7.1301	6.42992	6.12501	6.31727	6.9235	8.04605
GSM907238	6.49796	9.60837	6.69504	12.2297	13.7743	7.21093	9.69466	8.08779	8.23262	13.247	6.61379	8.00518	8.22688	8.57729	10.5894	6.09416	6.79734	7.58285	8.94685	8.34718	9.06633	8.90263	8.27295	6.3587	6.91382	10.9715	9.50501	6.51688	7.47109	6.42855	11.6074	7.24743	9.79803	14.2879	13.5896	10.5957	8.94424	9.20124	6.83622	13.611	6.20661	7.67287	7.06671	7.39145	6.3829	6.25838	7.62662	6.56388	8.22688
GSM907239	6.94832	8.99572	6.63151	11.9206	13.4945	7.07862	9.45278	8.33593	7.76205	13.3978	6.80237	7.98097	8.21081	8.8007	10.5723	6.12961	6.94172	7.63914	8.91971	8.10652	9.42227	9.10247	7.74343	6.20568	6.43328	11.2913	6.40503	6.8014	7.99429	6.69998	9.69218	7.39037	10.2327	14.1543	13.7682	10.9939	9.26304	7.89418	6.20513	13.2119	6.28347	8.03955	7.10472	6.55343	6.26753	6.0936	8.60551	6.80942	8.5192
GSM907240	7.15727	9.39896	6.65749	12.0306	13.3399	6.75531	9.28243	8.43404	7.4483	13.3656	6.60305	8.0389	8.88961	8.67394	10.616	6.03517	6.66945	7.52402	9.09493	8.60408	9.2904	8.84674	7.4578	6.19256	6.3767	11.0721	6.30681	6.79483	7.74537	6.76338	9.5779	7.21999	10.2041	14.0012	13.1129	11.2567	9.19204	6.82164	6.57975	13.0088	6.14664	7.52273	6.70992	7.10436	6.77415	6.21043	5.92392	6.93107	8.44542
GSM907241	6.77235	10.0269	6.70267	11.2396	13.9953	6.96514	9.72847	8.67782	7.49502	13.6128	6.5922	8.31553	8.95652	8.59029	11.2571	5.85431	6.74601	7.63601	9.29181	7.97931	9.05113	9.05031	7.76897	6.38425	6.60971	11.4057	7.05189	6.69598	7.4173	6.54098	10.3941	7.27763	10.1394	14.4283	13.6697	10.507	9.02834	9.31768	6.14791	13.3403	6.14301	7.63088	7.31819	7.26064	6.55653	5.97359	6.45202	6.48508	7.38226
GSM907242	6.39536	8.43682	6.67455	11.0658	13.9641	6.91186	9.61909	8.69528	8.12561	13.607	6.24195	7.94515	9.29641	8.86226	10.5914	5.92165	6.76329	7.64617	8.99117	8.0252	9.32839	9.66032	8.06955	6.25129	6.75567	11.2909	7.21109	6.61498	8.72536	6.26494	10.3648	7.03002	10.3539	14.2592	13.6113	10.2428	8.43705	9.07299	6.52358	13.5412	6.28131	7.24234	7.97235	7.25721	6.5351	5.94455	6.83087	6.29522	7.25049
GSM907243	6.52706	9.57509	6.98628	11.642	14.0437	7.37413	9.31746	8.24192	8.10829	13.4678	6.36431	7.9938	8.38791	8.48972	10.9391	5.92803	6.60268	7.77447	9.50422	8.06916	8.94649	10.17	8.30242	6.25688	6.77226	12.1623	7.41931	6.71295	7.97023	6.64007	10.351	7.09709	10.2955	14.4738	13.2964	10.2099	8.61692	7.60195	6.51961	13.8275	6.24646	7.55796	7.78987	7.42465	6.36805	6.12352	7.18518	6.71854	7.485
GSM907244	6.84644	9.61394	6.60144	12.0109	13.3074	6.70659	9.68342	8.30623	7.87178	13.4181	6.67971	8.44592	8.65018	8.73055	10.3749	6.18815	6.9349	7.19114	8.89262	8.5118	9.28969	9.19916	7.92141	6.55496	6.83368	11.2013	7.98181	6.8598	8.10177	6.6417	10.7085	7.37945	10.2525	14.04	13.3914	11.2015	8.9874	8.45812	6.70628	13.1814	6.35552	7.87878	7.40232	7.18127	6.63179	6.04279	6.08708	6.79552	8.08611
GSM907245	6.52684	9.77639	6.90694	11.3734	13.4148	7.45699	9.4889	8.27296	8.11007	13.4069	6.42426	7.61303	8.7638	8.52929	10.4497	6.18641	6.9128	7.49203	8.85922	8.26711	9.78388	9.21654	8.23729	6.20473	7.47586	11.1763	8.5015	6.74768	8.57436	6.6956	10.5903	7.22335	10.3012	14.1593	13.0423	11.0783	8.95046	7.8796	6.59302	13.2263	6.28857	7.81886	7.15038	7.39315	6.49451	6.22336	6.10585	7.02983	7.85028
GSM907246	6.73447	10.1336	6.78671	11.3204	14.1437	6.81637	9.70854	8.7106	7.83457	13.6473	6.67592	7.47968	8.29557	8.76278	11.07	6.08976	6.63829	7.74627	9.17644	7.86483	8.92887	9.288	7.93047	6.25019	7.00369	11.7691	6.6555	6.75207	7.51339	7.01695	11.3619	7.16418	10.3985	14.4781	13.0877	10.3377	8.92158	6.73273	6.43067	13.582	6.03855	7.37604	6.98283	7.29049	6.5048	6.1161	6.37479	7.14179	7.3237
GSM907247	6.53475	7.2867	6.82815	10.5254	14.0083	6.99533	9.83695	8.39303	7.47061	13.5121	5.96567	8.01125	9.15259	9.02489	11.1647	6.11911	6.94613	7.26596	8.68359	7.72715	9.20574	9.60253	7.98865	6.46128	6.13787	11.3203	10.5826	6.78102	8.39567	6.29108	10.775	7.28718	10.9135	14.3962	14.3351	10.3186	9.49844	9.28397	6.64868	13.7883	6.195	7.5274	7.65521	7.27258	6.49282	6.038	8.41532	6.4105	7.48653
GSM907248	7.33753	10.2341	6.6101	11.7944	13.3473	6.42059	9.39347	8.3221	7.32577	13.3674	6.30635	8.32304	9.13264	8.55852	10.2292	6.07428	6.41363	7.24041	9.01034	8.41766	8.76429	9.2187	7.43287	6.29439	6.22668	11.3574	7.51777	6.65841	7.60501	6.64404	8.30729	7.56815	10.4027	14.2049	13.2175	10.8656	9.73902	7.85199	6.38423	13.0676	6.10563	7.23535	6.58366	6.76826	6.64626	6.07908	5.88457	6.892	8.28057
GSM907249	6.61711	11.3776	6.88533	12.256	14.1057	7.13708	9.42608	8.41332	7.78509	13.6202	6.26701	8.12517	8.89886	8.50323	11.0664	6.11277	6.51365	7.91474	9.47418	8.19966	8.85546	9.62004	7.6806	6.13572	6.82457	10.887	6.6844	6.73712	7.76719	6.82299	11.4261	7.14541	9.95331	14.5678	13.2701	11.0511	8.95161	7.21114	6.64711	13.5698	6.17931	7.0314	7.03093	7.58093	6.57286	5.91511	8.7108	6.53126	7.63669
GSM907250	6.66058	7.28083	6.77596	11.5656	13.8442	7.40488	9.55886	8.36992	8.37004	13.3232	6.67295	8.08502	9.21604	8.31025	10.4262	6.2012	6.43982	7.45214	9.21138	7.94398	9.5078	10.0993	7.96077	6.25908	6.90947	11.0975	7.73692	6.65832	8.70211	6.51547	10.6986	7.0069	9.3925	14.1898	13.0479	10.7433	8.53583	7.8378	6.40963	13.6866	6.06828	7.40639	7.51253	7.42572	6.7861	6.10871	8.41689	6.56396	7.83594
GSM907251	6.5535	7.36392	6.67821	11.3981	13.9974	7.60323	9.90601	8.55941	7.82273	13.4518	6.73631	8.28857	8.50507	8.46675	10.6617	6.07935	6.86931	7.33447	9.13459	8.05239	8.89093	9.46221	7.85693	6.35045	6.78938	11.3128	8.18202	6.72764	7.95843	6.51842	10.5243	7.47557	9.89178	14.1361	13.8095	10.7701	9.0942	9.06893	6.45543	13.6815	6.22232	7.26463	7.73237	7.14251	6.5393	6.16305	7.35382	6.89039	7.47447
GSM907252	7.48933	11.4359	6.61504	11.8028	13.3782	6.67806	9.58974	8.51977	7.60158	13.3865	6.87851	8.34933	8.64737	8.34232	10.8494	6.11004	6.7835	7.73543	8.73529	8.3392	9.1083	10.0377	7.90877	5.97596	6.74168	11.5616	7.27197	6.56473	7.86292	7.02676	11.0948	7.28182	10.2748	14.0979	13.1712	10.9105	9.84205	7.72697	6.73393	13.1285	6.13397	7.61856	6.50476	7.07751	6.34215	6.08597	5.99767	7.15212	7.49326
GSM907253	6.91102	8.62073	6.73634	10.8781	13.4266	6.47348	9.60725	8.10351	6.91817	13.3244	7.1341	7.60882	9.26025	9.1898	10.6143	6.23724	6.60196	7.01027	8.66244	7.38174	9.34278	9.70783	7.66438	6.41589	6.43093	11.1236	9.15769	6.96318	8.4616	6.77902	9.92696	7.47873	10.6957	14.2903	14.135	10.0956	9.51625	9.62845	6.60452	13.0759	6.19937	8.20078	7.71768	7.225	6.33801	6.15005	6.35247	6.26553	7.86558
GSM907254	6.64148	10.4702	6.9618	11.7292	14.2767	6.92179	9.52899	8.42886	7.84332	13.9995	6.56078	7.66314	9.27083	8.63139	11.0473	6.08308	6.64995	7.78674	9.3473	8.32253	9.33469	9.75729	7.68752	6.446	6.77319	11.4648	7.09747	6.42666	7.75491	6.96035	9.78909	7.09501	10.7901	14.8141	13.6095	10.8526	8.85529	7.71934	6.35734	13.6064	6.20038	7.55333	7.19467	7.1772	6.48042	6.10917	6.38531	6.39922	7.82136
GSM907255	7.02606	9.3844	6.75505	11.9825	13.5429	6.87297	9.46376	8.3203	7.84824	13.5033	6.47578	7.51473	8.86318	8.75638	10.5013	6.14467	6.89089	7.87297	9.14863	8.37468	8.99026	9.86523	7.76276	6.35783	6.84361	11.2334	7.42819	6.87072	7.65614	6.59317	11.4091	7.16507	9.81169	14.2125	12.762	10.9807	9.01098	6.74346	6.60838	13.1157	6.2374	7.72968	7.39113	7.43899	6.55	6.11883	6.24473	6.70128	7.35876
GSM907256	7.1422	10.4505	6.84832	11.9044	13.9269	6.92154	9.28005	8.40242	7.63512	13.4603	6.5031	7.66132	9.44433	8.59557	10.4343	6.0029	6.75788	7.53779	9.06492	8.19988	9.13739	9.93278	7.66507	6.36598	6.63943	11.1251	8.50017	6.7605	7.98602	6.53431	10.434	7.13362	9.97115	14.1604	13.0041	11.0464	9.53016	6.50631	6.56468	13.4868	6.20446	8.1461	6.56198	7.183	6.37363	6.13162	5.82498	6.70971	8.38853
GSM907257	6.38782	9.56301	6.91506	11.9647	13.8137	7.0686	9.34325	7.87296	8.48129	13.4314	6.39951	8.11065	8.61648	8.71942	10.4748	6.05123	6.75479	7.75395	9.00506	7.87454	9.28952	9.6776	8.04653	5.98702	6.82776	11.5623	7.80469	6.51979	8.13066	6.60018	10.0133	7.18156	10.0826	14.2354	13.4918	10.4773	8.98105	8.56336	6.2906	13.562	6.26185	7.73004	7.67542	7.45532	6.78026	6.15187	6.47916	6.14483	7.63423
GSM907258	6.88946	8.43952	6.82351	12.0362	13.8208	6.76615	9.12787	8.59414	7.25675	13.6506	6.02643	7.91834	9.40232	9.03759	10.7372	6.11504	6.68418	7.90858	9.48584	8.26887	8.77979	9.71676	7.17932	6.11398	6.29615	11.2799	6.30558	6.54909	7.36693	6.65795	9.7282	6.88341	9.48586	14.067	13.5633	11.0356	9.43554	6.78736	6.69998	13.7134	6.08608	7.09123	6.51537	6.80759	6.50446	6.19377	6.28206	6.45604	8.04524
GSM907259	7.00516	8.00885	6.72468	11.9715	13.4641	6.6357	9.46001	8.38895	7.40242	13.3423	6.67636	9.12659	9.22018	8.36422	10.4726	6.01346	6.80957	7.63404	9.17735	8.37457	9.00651	9.84767	7.53423	6.49356	6.35894	11.0345	8.80826	6.98989	7.75222	6.55325	10.7729	7.22423	9.76526	14.0966	13.4641	11.2792	8.98021	9.34844	6.71915	13.1661	6.12801	7.74145	7.08899	6.87533	6.39406	6.08106	6.243	6.83527	8.34348
GSM907260	6.39499	11.7896	6.92167	12.2135	13.7909	6.86475	9.77466	8.04928	8.59734	13.5757	6.43244	8.43448	8.27372	8.04305	10.8261	6.15323	6.74461	7.55385	9.1185	8.28417	8.81929	9.40701	7.96911	5.99974	6.75408	11.2362	6.87983	6.64835	7.8979	6.7066	10.8972	7.24492	10.4186	14.3848	13.0469	10.7209	9.22931	7.41022	6.61242	13.7546	6.09986	7.17374	7.66494	7.13662	6.70019	6.18359	7.44421	6.4598	8.06475
GSM907261	6.8016	10.1531	6.77516	11.7824	13.6139	6.67544	9.32441	8.59062	7.34028	13.3507	6.40663	8.22339	8.37629	8.83103	10.3968	6.08897	6.65657	7.83934	9.12436	8.18169	9.15545	9.43695	7.75363	6.34686	6.46005	10.6667	9.03793	6.51778	7.84332	6.69749	10.2406	7.17199	10.1833	14.0153	13.2722	11.076	9.13696	7.87233	6.55039	13.3266	6.08616	8.06584	6.72302	7.04174	6.39611	5.98838	6.28033	6.27058	7.57659
GSM907262	7.04706	7.92924	6.50302	11.9916	13.6836	6.6919	9.47354	8.40365	7.73179	12.4628	6.64921	7.4093	8.87322	8.71188	10.5333	6.18762	7.20435	7.39279	8.91935	8.34131	8.64371	9.43388	8.16247	6.48348	6.18029	11.6756	6.34676	6.76818	7.11089	6.68981	10.6751	7.7536	10.171	14.2937	13.8	9.47929	9.36275	7.47355	6.75976	13.5566	6.21732	7.49815	6.88687	7.33344	6.39235	5.98066	7.61501	6.97974	7.54517
GSM907263	6.76699	8.5945	6.61458	11.4849	14.082	6.56617	9.57189	8.45445	7.518	13.2017	6.26675	8.49021	9.43802	8.78016	10.5036	6.04368	6.9557	7.4588	9.44226	7.9766	8.89509	9.71055	7.7737	6.12559	6.55356	11.6996	7.06932	6.66671	7.55588	6.67861	10.1779	7.3353	9.88101	14.3286	13.8396	10.2488	8.88751	8.77355	6.24584	14.0063	6.24956	7.23849	7.17618	7.17663	6.42206	6.22056	7.5495	6.60128	8.03043
GSM907264	6.56287	9.20397	6.74141	12.2295	13.6544	7.06249	9.23884	8.376	8.57383	13.3812	6.14647	7.89062	8.39794	8.36783	10.4479	5.977	6.80158	7.8311	9.25588	8.25798	9.12785	9.55278	7.86711	6.18078	7.02109	11.0281	7.52948	6.58771	7.80805	6.46093	10.216	7.59583	10.0534	14.1558	12.9164	10.8222	9.22633	7.78793	6.8987	13.6836	6.2807	6.94004	6.71073	6.93573	6.70374	6.26842	7.21384	6.7389	8.39065
GSM907265	6.81061	10.7623	6.61244	11.9229	14.0111	7.21233	9.52705	8.19893	7.5259	13.7433	6.06552	8.1031	9.02239	8.59803	10.4091	6.2478	6.29608	7.5723	9.2993	8.13534	9.06726	9.83159	7.53309	6.14253	6.49519	11.2961	6.68198	6.60258	7.71641	6.61117	9.9131	7.14658	9.94605	14.4111	13.417	10.9459	9.03138	7.89765	6.62668	13.6	6.22198	7.92565	7.05365	7.09196	6.25202	6.09015	6.69336	6.57416	7.67393
GSM907266	6.50022	8.65741	6.82793	12.1345	13.8524	6.75014	9.0271	8.31891	7.28576	13.4683	6.51608	8.33666	9.23051	9.08125	10.8649	6.10731	6.86715	7.95164	9.03632	8.10978	8.64841	9.90037	7.74101	6.13617	6.4772	11.1141	6.56147	6.74373	7.49257	6.45769	10.5298	7.13981	10.0631	14.283	13.6041	10.8983	9.05083	7.62019	6.66282	13.3517	6.18601	7.74608	6.92007	7.07645	6.56519	6.12037	8.77786	6.70997	7.93297
GSM907267	6.6258	9.84463	6.85169	12.1785	13.9934	6.87499	9.3037	8.12569	7.74715	13.579	6.36827	7.83975	8.6266	8.88455	10.7604	6.0877	6.53758	7.58957	8.90341	8.30633	8.90575	9.8026	7.80765	5.85186	6.99836	11.3321	6.6109	6.48584	7.81457	7.11034	11.9488	7.37043	10.4707	14.4844	13.0936	11.0911	9.65479	6.89036	6.53003	13.5213	6.12735	7.45249	7.02346	7.23758	6.41707	6.07443	6.52643	6.59529	7.25988
GSM907268	6.80595	10.7011	6.6446	11.8719	14.0841	6.96326	10.0156	8.29938	7.69334	13.5196	6.47821	8.26301	8.87326	8.46344	10.6313	6.13215	6.66281	7.55436	8.80721	8.06745	9.31502	9.04531	7.51407	6.16316	6.58011	11.5632	7.10709	6.61613	7.65663	6.2647	9.45342	7.10503	10.8719	14.453	13.7044	11.1168	9.44569	7.34261	6.92527	13.678	6.18497	7.79169	7.00487	7.36524	6.63657	6.12925	7.60626	6.71976	7.53291
GSM907269	6.61463	9.12887	6.83549	11.543	14.1423	7.22886	9.61994	8.33362	8.21151	13.3775	6.27105	8.30916	8.82387	8.38373	10.7689	6.02813	6.845	7.3919	9.26192	7.88106	8.81085	10.237	8.3133	6.28278	6.91643	11.2549	7.80504	6.68271	8.16672	6.52258	11.038	7.43813	10.1218	14.3104	13.4569	10.31	8.61256	8.19153	6.32634	13.7451	6.15525	7.63586	7.21854	7.2732	6.57618	6.12932	7.72366	6.28152	7.76483
GSM907270	6.61409	11.1646	6.91258	12.6329	13.6819	6.79762	9.45599	8.20127	7.62887	13.6572	6.30767	8.58502	8.47856	8.37995	10.8028	6.13374	6.40329	7.56998	9.5085	8.63345	8.7162	9.69166	7.42402	6.08481	6.39217	11.4957	6.96766	6.68268	7.41679	6.95173	9.50192	7.03212	10.5232	14.6685	12.8962	10.9938	9.65902	7.0721	6.51489	13.9804	6.09421	7.41943	6.54096	7.18226	6.42134	6.01252	6.57194	6.87542	8.54111
GSM907271	6.49142	8.713	6.72015	11.856	13.9667	6.99517	9.40631	8.20839	8.38979	13.4193	6.21463	7.40249	8.77904	9.23807	10.7942	6.21394	6.59671	7.66548	8.80866	7.82297	8.55172	9.46354	8.0373	6.56682	6.86242	10.9434	9.1311	6.52356	7.92224	6.47255	10.9263	7.0164	10.3523	14.0676	13.4577	10.5681	8.94793	8.4551	6.40728	13.7535	6.25294	7.95898	7.14127	7.39693	6.58211	6.0206	9.10949	6.45704	7.66758
GSM907272	6.41337	9.85127	7.24283	11.2004	13.6127	7.10648	9.14013	7.84292	7.66498	13.7147	6.1267	7.41342	8.75793	9.07497	11.1386	6.00887	7.10733	7.93997	9.26775	7.53638	9.18001	10.0878	8.32757	6.40185	6.97542	11.3523	9.38424	6.65898	8.19983	6.41217	10.7269	6.86074	10.6774	14.3942	13.4424	11.2224	8.84419	8.04101	6.41872	13.4956	6.17511	7.29934	7.24222	7.15326	6.27718	6.11049	6.06781	5.99993	7.48732
GSM907273	7.16319	8.77716	6.72507	11.6297	13.6451	6.55003	9.37755	8.31427	7.26961	13.3963	6.57443	8.01946	8.29936	8.57429	10.557	6.06132	6.73522	7.53124	9.09128	8.14568	9.26418	9.81395	7.77112	6.03074	6.64391	11.2966	6.64141	6.30563	7.46685	6.57051	11.6644	7.28006	9.62576	14.2889	13.5611	10.7035	9.41645	7.12456	6.46302	13.3878	6.18291	8.08992	6.47402	7.0108	6.34148	6.02022	6.14159	6.51173	7.54447
GSM907274	7.0141	9.65167	6.60714	11.6852	13.6205	6.72255	9.43512	8.54051	7.78511	13.405	6.50196	8.3501	8.27913	8.50655	10.4757	6.07408	6.58449	7.62832	9.21534	8.15029	9.04964	9.47658	7.79481	6.51989	6.74539	11.3499	7.50126	6.46193	7.62566	6.97334	10.577	7.48969	10.2657	14.2736	13.2387	10.6435	9.15252	7.6557	6.55292	13.4682	6.3082	8.00357	6.68524	7.04373	6.74027	5.99944	6.77617	6.80742	7.52201
GSM907275	6.71023	7.4057	6.87812	11.75	13.3705	6.62865	9.83749	8.26967	8.07827	13.5444	6.18947	8.32429	8.89287	8.79899	10.535	5.95146	6.81009	7.4033	8.79538	8.27657	9.09307	10.1379	8.00519	6.38494	6.36405	10.8249	8.95009	7.09567	8.35908	6.52269	10.8703	7.57666	10.3025	14.0229	13.5935	11.0936	9.54577	9.90673	6.61578	13.2066	6.2031	7.86516	7.5791	6.99763	6.30076	6.1409	6.32623	6.56535	8.28463
GSM907276	6.87668	7.10422	6.57868	11.8261	13.5504	6.61742	9.41637	8.39553	7.60935	13.2465	6.83356	8.88211	8.98649	8.66053	10.2191	6.13622	6.92063	7.64393	9.02878	8.18425	9.26424	9.6314	7.87072	6.16717	6.40494	10.9263	8.56087	6.77521	7.78374	6.19539	10.5666	7.21181	9.49399	13.952	13.4093	10.9688	9.31426	9.37944	6.50592	13.2806	6.17435	7.77396	7.5014	6.81374	6.49334	6.19393	5.64092	6.90481	8.66793
GSM907277	6.668	10.3472	6.36946	11.8769	13.7843	6.82987	9.93337	8.17959	7.98751	13.5959	6.47207	7.32533	8.65555	8.69891	10.4425	6.01718	6.60502	7.28942	8.71334	8.20434	8.87779	9.41962	8.03556	6.4283	6.55372	11.4532	7.65011	6.70486	8.03053	6.17705	9.8316	7.39372	10.3455	14.374	13.7681	11.2101	9.27902	8.84895	6.64534	13.8263	6.09493	7.46887	7.06825	7.44109	6.42425	6.12512	7.39775	6.73543	7.60125
GSM907278	7.0517	10.8805	6.90287	11.5792	13.7015	6.74705	9.39932	8.30028	7.05567	13.4972	6.36836	8.2342	9.31208	8.72864	11.1191	5.96635	6.45624	7.76972	9.22943	8.22928	8.94135	9.58266	7.51346	5.9582	6.35339	11.4912	6.17181	6.46842	7.66355	7.0818	10.4297	7.48662	10.3101	14.2273	13.0434	10.9461	9.4542	6.73933	6.6439	13.2459	6.22408	7.54123	6.34324	7.03922	6.48864	6.12348	6.36594	6.72093	7.52225
GSM907279	7.04518	10.2877	6.81412	11.9644	13.501	6.76116	9.51506	8.51762	7.84932	13.4805	6.73668	7.52623	8.73422	8.85887	10.4399	6.16244	6.72933	7.62277	9.39187	8.27981	8.9013	9.89173	7.63166	5.93685	7.04314	11.439	6.54171	6.62686	7.41446	6.83443	11.0725	7.31256	9.89667	14.1914	12.7777	11.0438	9.19453	6.57706	6.6376	13.1845	6.13709	7.56457	6.77541	6.98632	6.46504	6.15611	6.55919	6.53165	7.79448
GSM907280	7.09763	9.43787	6.63599	11.725	13.8072	6.85283	9.54239	8.699	7.01102	13.5185	6.4278	8.57754	8.8114	8.67135	10.7073	5.98071	6.61706	7.6202	9.22321	8.08575	8.86266	9.76585	7.67411	6.10672	6.53085	11.5943	7.55635	6.61492	7.66243	6.76539	10.8105	7.60631	9.61659	14.2086	13.1543	10.6124	9.67516	7.15496	6.47386	13.3292	6.12926	7.73262	6.1532	7.24245	6.48886	6.10379	6.01411	6.68299	7.27767
GSM907281	7.10775	11.0814	6.62705	11.4782	13.5755	6.56104	9.7359	8.38274	7.50639	13.4126	6.86357	7.3813	8.44383	8.74189	10.8141	6.15166	6.49021	7.43	9.04221	8.02939	8.73367	9.98116	7.57003	6.34602	6.38591	11.125	5.99017	6.61125	8.08664	6.97137	9.59569	7.36414	10.3623	14.1462	13.0515	10.7319	9.73917	6.92683	6.77938	13.1375	6.2082	7.12128	6.37073	7.06059	6.50473	5.94971	6.02378	6.26987	7.59044
GSM907282	6.66634	10.4267	6.64618	12.1475	13.9775	6.69121	9.79545	8.27472	7.7419	13.7167	6.60588	8.43918	8.69645	8.51304	10.5586	6.17783	6.38539	7.8192	9.14397	8.02748	9.30411	9.17837	7.70131	5.81037	6.52045	11.5727	7.93961	6.5415	7.51325	6.8969	10.359	7.28508	10.0786	14.5059	13.3629	11.2292	9.2261	7.38593	6.73094	13.7089	6.33099	8.04277	7.00002	7.46773	6.54267	6.42059	6.89574	6.55672	7.41941
GSM907283	6.72538	10.9941	6.92506	11.3715	13.9276	6.82179	9.41666	8.5605	7.56402	13.6397	6.63094	7.88948	8.76945	8.68824	10.8475	6.03105	6.45324	7.90317	9.03461	8.17873	8.92795	9.85971	7.66299	6.15992	6.56692	11.4422	7.50855	6.43057	7.57812	6.90966	10.6734	7.21331	10.2336	14.4429	13.3954	10.576	8.89019	8.41118	6.1237	13.5013	6.18853	7.55072	6.81395	7.05142	6.58924	6.06483	7.03937	6.56831	7.58438
GSM907284	6.86736	10.5274	6.82177	11.9642	13.5746	6.95615	8.93128	8.47846	7.6682	13.3782	6.48899	7.90206	7.87939	8.48557	10.6336	5.94519	6.8187	7.92452	8.81331	8.26263	8.72494	9.72155	8.12765	6.1426	6.89937	11.2165	7.11731	6.46641	7.90267	6.98844	11.8435	7.36046	10.6239	14.2333	13.1452	10.9958	9.70604	6.64284	6.71004	13.2411	6.07165	8.18095	6.86821	6.88732	6.26781	6.10741	10.1273	6.76176	8.2498
GSM907285	6.77199	10.1662	6.74645	11.6136	14.1408	6.74123	9.78739	8.3948	7.77708	13.6143	6.18806	7.895	8.88227	8.98228	10.9369	6.04783	6.84644	7.67384	9.25728	8.01571	9.0908	9.90591	7.72019	6.17466	6.82857	11.6081	7.94369	6.35222	7.43579	6.95982	9.84816	7.03525	10.5455	14.4841	13.7856	10.4764	9.03179	8.52938	6.44692	13.8325	6.14751	7.63269	6.87432	6.92242	6.38649	5.96268	6.47131	6.63244	8.0456
GSM907286	7.37724	10.1066	6.73825	11.9372	13.4229	6.70651	9.30023	8.46606	7.4859	13.4571	6.50919	8.4499	9.2781	8.59542	10.1439	5.99212	6.76526	7.71254	9.28874	8.47041	8.90376	9.22914	7.44148	6.13406	6.48208	11.5698	7.56957	6.65773	7.48182	6.45298	9.44281	6.99335	9.99318	14.0476	13.1715	10.9017	9.15154	9.27345	6.5593	13.0367	6.06473	7.76253	6.80243	7.18975	6.47502	6.27755	6.05053	6.58334	7.84884
GSM907287	6.62491	11.2491	6.82994	11.1608	14.3797	6.90213	10.3027	8.41836	7.60383	13.8066	6.32252	7.44679	8.24512	8.93039	11.2849	6.00038	6.58405	7.90796	9.4837	7.80297	9.12737	10.1056	7.71706	6.41401	6.89885	11.8269	6.50325	6.36998	7.33751	7.25413	10.4931	7.04745	10.5603	14.8935	13.5313	10.3748	9.11683	6.87356	6.44206	13.9511	6.17508	7.50284	6.61902	7.19885	6.28719	6.06712	7.06956	6.43667	7.49501
GSM907288	7.02919	11.5349	6.89235	11.9891	13.547	6.89064	9.2824	8.1421	7.65312	13.5092	6.74913	7.96913	9.14516	8.23369	10.7216	6.09117	6.46518	7.5922	9.25048	8.43364	9.21721	9.58452	7.46142	6.15204	6.46073	11.542	6.46892	6.86705	7.83646	6.75604	10.0643	7.42671	10.9126	14.2578	12.8479	11.4683	10.017	6.64561	6.47311	13.2827	6.18615	7.7851	6.12741	7.1252	6.59372	6.0359	6.2005	6.96096	8.18916
GSM907289	6.92869	9.99779	6.96333	11.9308	13.4576	7.14727	9.38516	8.2597	7.93677	13.4516	6.09307	7.65996	8.67822	7.82729	10.4253	6.12111	6.53714	7.65878	9.09773	8.16575	9.3292	9.75837	8.16599	6.17184	7.03318	11.2966	5.98118	6.91189	8.33297	7.0144	11.1723	7.29738	10.1883	14.3622	13.0089	11.2242	9.22967	6.71055	6.62758	13.0254	6.06074	7.82773	7.06315	7.69233	6.88937	6.15222	6.03352	6.75675	7.79577
GSM907290	6.47903	9.36467	6.91511	12.1559	13.7253	7.11702	9.27134	8.18763	8.06064	13.4143	6.4656	8.21551	8.6492	8.47765	10.6691	5.96727	6.4963	7.60074	9.00232	8.3208	8.92582	9.45875	8.08451	6.03416	6.66215	11.3136	8.19804	6.58804	7.72144	6.39533	11.1357	7.24634	10.2046	14.3469	13.5623	10.7567	9.02488	7.55238	6.59157	13.7039	6.17326	7.85321	6.99768	7.23405	6.40822	6.22586	8.02538	6.89271	8.14287
GSM907291	6.72447	9.95651	6.91595	11.9494	13.8006	6.76336	9.71297	8.31903	7.92949	13.4248	6.26873	8.21241	8.42491	8.3504	10.5264	6.0165	6.51247	7.67828	9.02804	8.21099	9.33003	9.88334	8.13319	6.19295	6.78624	11.3943	10.3235	6.63597	7.64567	6.67915	10.5156	7.20725	10.3017	14.3516	13.7548	11.1844	9.56439	9.50925	6.54507	13.5385	5.97216	7.69024	7.76882	7.27632	6.37536	6.12426	6.47708	6.64472	7.53164
GSM907292	7.26426	10.6798	6.87885	11.8515	13.6445	6.93586	9.71942	8.60882	7.96465	13.1387	6.99342	7.86406	9.22624	8.67792	10.5966	5.9115	6.66428	7.46953	9.12736	8.11775	9.0845	9.65036	7.61208	6.50064	6.55014	11.5337	6.64895	6.70256	7.72886	6.60758	10.3872	7.57803	10.1703	14.007	13.8739	10.4866	9.14723	8.524	6.49697	13.2164	6.30843	7.77404	7.27556	7.02078	6.53331	6.17215	7.23476	6.40286	7.9038
GSM907293	6.72859	10.3956	6.85747	11.6349	13.7797	6.89001	9.42573	8.29855	7.61883	13.5473	6.2875	8.22023	8.85228	8.85921	10.7442	6.09163	6.5239	7.45661	9.09411	8.10964	9.2131	9.08753	7.57535	6.23137	6.67113	11.6477	7.10091	6.83841	7.75458	6.53804	9.55203	7.07087	9.86161	14.3288	13.4688	10.5686	8.8333	8.36792	6.4442	13.5575	6.10749	7.40344	6.98452	7.14354	6.36669	6.2131	7.81422	6.7584	7.75385
GSM907294	6.49272	10.2417	6.63249	11.8987	13.9296	6.84812	9.5569	8.11895	7.93557	13.7468	6.48288	8.2561	8.47293	8.8566	10.7374	6.09848	6.76448	7.70087	9.07454	7.8224	8.87831	8.93693	7.74707	6.28202	6.60373	11.6726	7.54134	6.67761	7.46363	6.64614	10.3253	6.90591	10.9166	14.4997	13.782	10.931	9.13256	9.00217	6.6996	13.6659	6.21004	8.3431	7.44052	7.12547	6.45924	6.11372	6.76803	6.30877	7.68551
GSM907295	6.72672	8.98408	6.65212	11.5998	13.296	6.87259	9.30889	8.34321	7.87449	13.5111	6.77946	7.91531	8.49941	9.05384	10.6727	6.01018	6.90161	7.50584	9.05001	8.15624	8.64586	9.29811	7.8079	6.0515	6.76685	10.8483	6.99174	6.67852	7.79909	6.54072	11.1697	7.25001	10.1497	14.1371	13.5542	10.7334	8.99463	7.59743	6.44372	12.9909	6.06238	7.26716	6.90252	7.00852	6.79625	6.12823	8.22262	6.67153	7.24264
GSM907296	6.59053	9.33137	6.7783	11.7038	14.1084	7.27417	9.56307	8.74429	7.75597	13.7267	6.51045	8.78856	9.35981	8.43479	10.6238	6.04944	6.6888	7.69541	9.09031	8.12496	9.14319	10.2443	7.59663	6.1218	6.75201	11.7613	7.11259	6.71447	7.75598	6.78942	10.0674	7.46375	9.7638	14.4652	13.2267	10.5045	8.69481	9.03387	6.69028	13.7638	6.3024	7.2706	7.70325	6.95907	6.62877	6.09887	6.51351	6.60838	7.71599
GSM907297	6.95857	9.77159	6.89808	12.1034	13.5597	6.87048	9.15647	8.4541	7.27848	13.2133	6.45412	8.78678	8.97864	8.5693	10.1958	6.04374	6.6792	7.7809	9.36145	8.32714	9.00523	9.78719	7.49177	6.10248	6.57717	10.8471	7.01843	6.65695	8.11433	6.82148	10.568	7.35641	9.91034	14.2883	13.2628	11.1915	9.49787	7.56859	6.87504	13.2769	6.1621	7.89365	6.50372	6.66093	6.55599	6.03892	7.14949	6.73368	8.69048
GSM907298	6.8402	7.17903	6.66364	11.6948	13.4237	7.81514	9.79153	8.56627	8.26234	13.1534	6.56393	8.42746	9.1395	8.44866	10.2902	5.99413	6.72262	7.22467	8.88488	7.98537	9.03407	9.80021	8.38702	6.66668	6.57683	11.1082	7.83269	7.12957	8.21019	6.06063	10.0533	7.49173	9.66184	14.0159	13.4698	10.6959	9.26725	8.89225	6.60867	13.2308	6.06815	7.30078	8.04851	7.22971	6.3554	6.21944	8.15103	6.69048	8.21342
GSM907299	6.66623	9.83188	6.89484	12.4032	13.6064	6.59977	9.2784	8.44813	8.6217	13.4291	6.41725	8.51437	8.90875	8.13388	10.3086	5.9905	6.58769	7.60381	9.14994	8.17776	8.62973	9.66299	8.04169	6.04724	6.79482	10.408	7.49845	6.55819	7.78959	6.60018	10.6272	7.07013	9.08473	14.2076	12.6115	11.048	8.99947	8.60054	6.672	13.7325	6.12955	7.42704	7.30487	7.18479	6.71049	6.0759	6.61351	6.62582	8.12985
GSM907300	6.50986	9.18725	6.88816	11.6052	14.2372	6.97044	9.28572	8.47527	7.77064	13.1222	6.24574	8.61966	8.85151	9.03563	10.8108	6.15484	6.71551	7.60571	9.3871	7.93812	8.87911	9.9907	8.10234	6.42668	6.9237	11.7116	7.30204	6.43657	7.87776	6.86273	10.5489	6.79128	10.3351	14.6605	13.7754	10.3372	8.97205	7.15591	6.34899	13.7584	6.05762	7.27232	7.16866	7.22506	6.525	6.07826	7.95006	6.40793	7.90398
GSM907301	7.00445	8.23797	6.71808	12.0781	13.2705	6.49747	9.28501	8.51146	7.41048	13.1621	6.56479	8.74152	9.07183	8.71579	10.0232	6.04509	6.55387	7.64103	9.12425	8.37276	8.71623	9.47609	7.67777	6.31219	6.41622	11.135	8.87183	6.79235	8.0438	6.23995	10.7337	7.13157	10.268	14.0754	13.2641	11.1051	9.29131	8.20603	6.70615	13.1173	6.31129	7.6893	6.49371	6.87428	6.42054	6.02684	6.086	6.61617	8.51719
GSM907302	6.46615	6.92981	6.69128	12.5637	13.4227	6.55441	9.52361	8.07806	7.88469	13.5315	6.51683	8.80189	8.74603	8.29156	10.5582	6.08915	6.98092	7.73057	9.39263	8.26015	8.21133	9.09247	7.65393	6.14379	6.30484	10.9698	8.8229	6.48372	7.17278	6.87352	8.70653	7.12849	9.89005	14.3044	13.2879	11.0005	8.88199	8.66978	6.60454	13.8644	6.14519	7.47027	7.15265	6.93086	6.54121	6.13858	6.52879	6.45487	8.31213
GSM907303	6.85204	7.60953	7.00651	11.9315	13.6903	6.40064	9.28084	8.32753	7.62816	13.2299	6.561	8.49868	8.95441	8.70671	10.1358	6.16303	7.28738	7.61838	9.046	8.13845	8.76952	9.93595	7.64839	6.3697	6.62606	11.0988	8.63069	6.81996	7.91336	6.31488	11.0522	7.16986	10.089	14.051	13.1442	10.9358	9.11722	7.64153	6.60696	13.34	6.186	7.61167	7.19956	6.97967	6.51435	6.29693	6.57227	6.95553	8.11475
GSM907304	6.48272	8.39669	6.6707	12.1098	14.0195	7.12796	9.43753	8.14701	7.44353	13.7745	6.52878	8.16546	8.94196	8.6798	10.7649	6.10522	6.59927	7.91309	9.22039	8.3103	8.8975	9.53727	7.25101	6.10905	6.49264	11.0191	8.07209	6.49843	7.6168	7.01473	9.4756	7.08975	9.96457	14.5712	13.6428	11.1491	9.34316	7.99401	6.53564	13.7259	6.18218	7.59826	6.92883	7.24704	6.39609	6.10222	6.6091	6.64733	7.87204
GSM907305	6.90402	10.3768	6.54638	11.0502	13.8035	6.75989	9.8855	8.3551	7.91847	13.4784	6.36414	7.9491	8.76229	8.8582	10.6249	6.21519	6.82431	7.50063	8.86316	7.81247	9.70186	9.81985	8.20356	6.50536	6.76925	11.3529	7.59042	6.41796	7.87649	6.63055	10.3449	7.2855	10.2169	14.1911	13.6488	10.3418	8.86461	8.60176	6.32124	13.738	6.1787	7.54826	7.42184	7.20381	6.53885	6.14461	6.61239	6.57341	7.47724
GSM907306	6.5501	8.7233	6.74915	12.7158	13.3608	6.75779	9.33162	8.05342	8.14226	13.6492	6.00654	8.39171	9.03297	8.76281	10.7972	6.10433	6.5941	7.82659	9.27623	8.40511	8.36333	9.81135	7.81416	5.97514	6.70332	11.136	8.03966	6.45215	7.40156	6.57562	10.2116	7.11688	10.2195	14.4905	13.2914	10.8077	9.07823	7.81517	6.67333	14.019	6.26219	7.09475	7.19902	6.96227	6.42316	6.14284	6.77111	6.48398	7.96237
GSM907307	6.9862	7.07744	6.67301	12.1781	13.3196	6.80559	9.36204	8.76118	7.32385	13.4078	6.46028	8.37022	9.37565	8.84334	10.3783	6.15565	6.60141	7.61448	9.04189	8.39832	8.27389	9.6671	7.46334	6.06792	6.11988	11.0731	9.1413	6.68504	7.8366	6.1146	8.22712	7.2392	9.7134	14.0753	13.0117	11.3312	9.22177	8.33765	6.92913	13.0855	6.25344	6.93365	6.99059	6.71806	6.53721	6.2275	6.14973	6.90683	8.46606
GSM907308	6.49648	11.39	7.26951	11.3995	13.9045	7.73092	9.73047	8.18446	7.55019	13.6673	6.6538	7.80791	8.21062	8.91751	11.3403	6.04587	6.70026	8.04994	9.27846	7.77354	9.2993	9.62281	8.21519	6.3714	6.83845	12.356	6.48507	6.56412	7.89256	7.1169	10.2152	6.99995	11.1466	14.4465	12.9409	10.3852	9.07929	6.85773	6.29765	13.7384	6.19721	6.5897	7.13501	7.22958	6.45184	6.07164	7.39534	6.7004	7.50735
GSM907309	6.81392	10.6746	7.17507	12.4057	13.87	6.978	9.29227	8.09483	8.1384	13.5861	6.57073	8.15476	8.60447	8.50663	11.0058	6.09648	6.51336	7.77846	9.11123	8.24016	9.2354	10.0028	7.7856	6.27206	7.65569	10.9827	6.11109	6.65838	7.77958	6.88692	12.4692	7.37261	11.0994	14.6449	13.3283	10.784	9.66529	6.42398	6.6578	13.5022	6.04529	7.81492	6.82811	7.06826	6.83476	6.16029	8.78416	7.11769	8.41823
GSM907310	6.89167	12.0234	6.95093	11.3257	14.0984	8.10217	9.6469	8.06865	9.03871	13.5744	6.57891	7.33289	7.84399	7.77194	10.5429	6.01775	6.50461	7.60344	8.93454	7.70213	9.44149	9.89472	8.77557	6.0725	7.76146	11.5028	6.30123	6.85623	8.16792	6.95648	11.4837	6.99254	9.52732	14.2866	13.1832	9.85378	8.57067	7.29737	6.38257	13.721	6.20248	7.41607	6.87575	8.08254	7.16042	6.23416	9.25156	6.50787	7.23596
GSM907311	6.59878	11.9883	6.7095	11.4771	14.1131	7.19372	9.81793	8.46707	8.14041	13.7442	6.37675	7.80908	9.04061	8.44094	11.1017	6.09418	6.75215	7.59856	9.06085	7.83758	9.4762	9.93469	8.15205	6.35346	6.89757	11.9863	6.81691	6.59623	7.90798	6.45803	10.7547	7.09737	10.5281	14.5691	13.1824	10.5253	8.95403	6.75792	6.46049	13.8326	6.20714	7.20356	7.16906	7.19805	6.55881	6.25162	7.49816	6.63972	7.31788
GSM907312	6.15672	7.33447	6.41453	11.4804	13.638	9.54752	10.2025	7.97626	9.80418	12.6301	6.38061	9.97968	7.47724	6.45004	9.16172	6.01429	6.13619	8.1196	7.87969	7.44188	8.42921	9.3718	9.61383	5.9677	7.15466	9.44161	6.14564	7.07228	7.99363	7.3675	11.7151	7.45765	9.68779	14.2912	13.353	9.62454	8.82681	6.97893	6.65573	13.4269	6.38932	7.20848	6.25235	8.15246	8.43542	6.12674	8.98907	6.03047	6.75989
GSM907313	6.79865	11.2066	6.72667	11.893	13.2949	6.88407	9.13387	8.31945	8.0214	13.4777	6.8419	7.81527	8.17472	8.47408	10.6626	6.02266	6.32594	7.30795	9.16463	8.29508	9.05228	9.06113	7.83849	6.33828	7.29627	11.7742	5.80252	6.81859	7.36028	7.40848	12.6408	7.19305	10.6911	14.2345	13.3357	10.6861	9.24027	6.43547	6.6612	13.0434	6.26154	7.75781	6.03027	7.82521	6.87186	6.14393	8.32854	7.03307	7.19375
GSM907314	6.56949	10.2357	7.08789	11.3669	14.0508	7.71014	9.58257	8.16254	9.29766	13.4044	6.50579	7.42008	7.64026	7.02126	10.9851	6.14968	6.54444	7.48924	8.68677	7.79044	9.66175	9.47608	8.51978	6.23338	8.77769	11.2146	6.08556	6.50886	7.70772	7.43196	12.427	7.09435	10.2603	14.8569	13.5653	9.96756	8.5672	6.93388	6.13094	13.5623	6.03057	7.13548	6.61234	7.9342	7.34448	6.60953	7.39181	6.2807	7.41827
GSM907315	6.30915	6.69902	6.58634	11.365	13.3372	8.79702	9.30338	8.53166	10.0001	13.0051	6.72611	8.73383	7.68498	6.5874	9.30828	6.02082	6.71863	7.66679	8.81216	7.83493	9.03887	9.35955	8.63202	6.29727	8.3933	9.93011	6.02029	7.07541	8.30975	6.62966	11.6054	7.04248	9.20796	13.9941	13.2376	10.3328	9.4169	6.56659	6.00292	13.1395	6.32725	7.48043	6.92462	8.36108	8.10516	7.01441	8.35292	6.0846	7.38109
GSM907316	6.80108	7.38211	6.84962	11.1451	13.6392	7.15043	9.24747	8.45644	8.77329	13.1958	6.91197	7.37989	8.17056	7.52299	10.2316	6.18666	6.41968	7.40882	8.79992	7.69158	8.95495	9.24732	8.17187	6.22518	7.33778	10.1072	7.05252	6.51892	7.78249	6.89488	11.9377	7.39585	9.65157	13.8342	13.8995	10.1994	8.56746	7.03064	6.16822	13.235	6.34403	8.00319	7.30118	7.80811	7.55797	6.21659	7.76659	6.05739	7.68628
GSM907317	6.56045	10.1549	6.96029	12.156	14.0924	7.29861	9.43471	8.08255	8.06361	13.9778	6.33813	7.5872	8.18996	8.02037	10.9172	6.09517	6.25105	7.76246	9.24228	8.0751	9.06618	9.95898	7.72993	6.40839	7.99721	11.8514	6.33292	6.44369	7.27632	7.90749	13.3917	7.11108	10.9021	15.124	12.9581	11.0123	9.60172	6.81352	6.48628	14.0442	6.11136	7.49042	6.42343	7.92165	7.04294	6.10837	9.18193	6.53139	7.43465
GSM907318	6.8507	10.3117	7.26693	11.979	13.7252	7.25854	9.19622	8.20021	7.71832	13.6774	6.34645	7.71505	8.51991	8.3158	10.9564	5.87964	6.24432	7.79084	8.99289	8.06443	9.3799	9.82703	7.65032	6.34805	7.08335	10.8005	6.05294	6.46647	7.6819	7.56741	12.0469	7.07576	10.1903	14.4463	13.4752	10.6026	9.31826	6.62595	6.28186	13.4054	6.20398	7.45896	6.44953	7.38443	6.51726	6.06575	7.27297	6.55826	7.85299
GSM907319	6.76774	8.7084	7.05258	11.5295	13.5495	9.67931	9.81518	8.26734	9.79198	13.3732	6.55868	10.3363	8.45145	6.93219	10.2901	6.02051	5.92832	7.55437	8.54081	7.56737	9.61076	9.43716	8.76641	5.80681	7.43465	11.463	6.08999	6.7999	7.89003	7.10707	12.2222	7.04181	10.0012	14.2385	13.3178	10.4192	8.53263	6.6026	6.62496	13.2225	6.11334	8.14428	6.26481	8.11033	8.83661	6.15999	9.67263	6.60253	7.03155
GSM907320	7.0357	10.6172	7.04753	11.5735	13.7113	6.67161	9.23278	8.494	8.47659	13.0859	6.57368	8.72347	8.69305	8.50532	10.8681	6.08118	6.53892	7.26259	8.80568	8.34794	9.63851	9.91869	8.48448	6.18984	7.44026	11.7973	5.83709	6.77427	7.8557	7.37143	11.8708	6.76007	11.1058	14.4401	13.7698	10.669	9.25115	7.89383	6.59783	13.1903	6.10448	7.78215	5.96478	7.42657	6.52113	6.0016	8.84989	6.87412	8.2691
GSM907321	6.4569	12.2098	7.20737	12.3236	13.8195	6.95799	9.49067	8.18211	8.48637	13.6426	6.35519	8.86221	8.61535	8.60527	10.7364	6.07668	6.40942	7.85687	9.2906	8.15872	9.10319	9.55395	7.75624	5.91545	7.33461	11.9149	6.36896	6.4669	7.51262	7.13212	11.776	7.0112	11.4823	14.889	13.2809	10.5101	9.2677	7.40997	6.65057	13.7981	6.17117	7.5423	6.30186	7.51898	6.48378	6.07674	10.3691	6.80719	7.88476
GSM907322	6.73797	10.9354	7.22084	11.4865	14.248	8.21332	9.84171	7.97175	9.14544	13.8007	6.48596	7.97949	7.95208	7.85925	10.6913	5.9554	6.40264	7.46306	8.80014	7.43972	9.74909	10.1129	8.23091	5.99434	8.51476	11.3792	6.23262	6.63599	8.31021	7.58711	13.0668	7.51928	10.3991	14.7497	13.3025	10.3438	8.96359	6.81186	6.21754	13.7741	6.25983	7.19826	6.3648	8.20764	6.68843	6.37443	11.0995	6.23822	7.07984
GSM907323	6.64284	11.4956	6.9152	11.2803	14.1642	6.938	9.8653	8.53748	7.47491	13.9537	6.41459	7.41962	8.31899	8.59094	11.2038	6.11299	6.59545	7.87905	9.18075	7.72234	8.94557	9.30886	7.67569	5.99473	6.65502	11.8873	6.47678	6.48984	7.62617	7.00388	11.341	7.15275	11.0309	14.6688	13.3812	10.6521	9.29684	7.15509	6.41913	13.8245	6.3705	7.39826	6.57212	7.3119	6.58025	6.13491	7.9427	6.72299	7.44161
GSM907324	5.94396	8.88397	6.65682	11.5838	13.7457	9.20092	9.67612	8.01978	9.54329	12.8944	6.58194	9.63943	7.57841	6.29724	10.0333	6.10096	6.20193	7.61228	8.67418	7.58674	8.82567	9.68881	9.09897	6.17416	7.53172	10.148	6.43548	6.82283	7.63953	6.77408	10.2756	6.62721	10.2939	14.3768	13.661	9.95355	8.94773	7.03127	6.4847	13.9198	6.23479	7.37175	6.56065	8.16094	7.54993	6.71934	8.94968	6.11724	7.58342
GSM907325	6.51807	9.68081	6.87306	11.6742	13.7663	8.08219	9.16894	7.99061	9.69582	13.4742	6.28545	7.79978	7.6641	7.31319	10.2142	6.11478	6.42205	7.71398	8.91039	7.95223	9.45571	9.61653	8.08147	6.0563	7.81182	10.5748	6.8684	6.54974	7.97417	6.59858	10.2046	7.23956	10.0781	14.1583	13.7328	10.6759	8.90806	6.79185	6.46262	13.5031	6.17521	7.87529	8.00078	8.05061	7.44463	6.49252	8.45306	6.45809	7.23082
GSM907326	7.03441	9.7914	6.9718	12.0145	13.4494	6.94069	8.91824	7.953	7.82279	13.5579	6.14806	7.03161	8.13752	8.08518	10.8439	6.10146	6.40939	7.88571	8.80344	8.09571	9.17912	7.37747	7.46031	6.10973	8.49909	10.839	5.7978	6.71303	7.77548	7.27088	12.2252	7.39255	10.791	14.3919	12.4062	11.0942	9.36957	6.31783	6.48805	13.2668	6.40038	7.98193	6.16453	7.69521	7.19001	6.02342	8.07411	6.26906	7.77554
GSM907327	6.81786	9.79079	6.92404	11.9949	13.4381	7.05207	9.03623	8.13955	7.71025	13.5542	6.59763	7.45918	8.64457	8.20509	10.7297	5.9954	6.4403	7.04337	9.02444	7.99819	9.01524	7.69421	8.23903	6.21229	8.39027	11.6086	5.83079	6.80918	7.84279	8.21051	11.7142	7.7067	10.5099	14.2546	12.548	10.8175	9.33732	6.25222	6.47642	12.9905	6.15579	7.5502	5.91117	7.99543	7.1828	5.9154	9.21552	6.94695	7.34304
GSM907328	6.43655	10.521	6.7483	12.2214	13.9542	8.74493	9.91935	7.82043	8.16501	13.5467	6.34184	9.97506	8.59104	7.82244	10.6664	6.06478	6.30799	7.55871	8.90292	7.81488	9.35687	7.70922	8.09771	5.97121	7.67971	12.0003	6.33474	6.16181	7.82554	8.06266	11.7646	7.31003	10.8388	14.7711	13.1437	10.7714	8.69655	6.59848	6.38858	13.9416	6.15673	7.54107	6.54604	8.50366	7.75105	6.15124	10.9456	6.30599	7.11091
GSM907329	6.49404	10.1558	7.0077	11.6126	14.4166	7.68093	9.50061	8.09068	8.43925	13.6955	5.96234	7.57448	7.75985	7.67986	11.1938	6.14713	6.07517	7.35936	9.0345	7.6201	9.26001	8.55282	8.12193	6.33613	8.53702	11.3259	6.35683	6.30389	7.73294	7.25052	11.6154	7.2252	10.5903	14.9762	13.3482	10.285	8.76477	6.99136	6.56587	14.0603	6.23374	7.4204	6.68556	7.95145	6.99296	6.04161	7.72208	6.23959	7.52106
GSM907330	7.21829	9.62486	7.25634	11.8596	13.8286	8.63359	8.98403	8.23386	9.35135	13.5772	6.57549	9.21452	7.87694	7.34028	10.2714	5.99424	6.04101	7.66586	8.66818	7.73107	9.65393	7.91212	8.70405	6.0255	8.53678	11.2687	5.87607	6.83015	8.189	7.50375	12.6847	7.37769	9.92297	14.4389	13.0601	10.6633	9.24136	6.45418	6.71033	13.5269	6.10695	8.15174	6.11422	8.15831	8.2219	6.53426	8.90273	6.57093	7.26051
GSM907331	6.82717	10.1494	7.19016	11.5057	14.0383	7.0645	9.40725	8.36557	7.93539	13.7322	6.42251	7.46253	8.31868	7.93281	10.9789	5.93115	6.18827	7.59049	9.15747	7.81627	9.39056	7.96448	7.77882	6.10379	8.2642	11.3418	6.202	6.52719	8.14049	7.84584	11.8393	7.31759	10.737	14.7139	12.8632	10.2454	9.11986	6.65145	6.35065	13.9807	6.12786	7.19984	6.04343	8.25102	7.3953	6.22799	6.96436	6.39053	7.35813
GSM907332	6.48196	9.13793	7.02433	10.719	13.6377	7.99423	9.7403	8.51439	9.06443	13.1786	6.33634	7.82751	8.0096	7.48147	10.0759	5.99092	6.79954	7.54718	8.86618	7.31243	9.09887	8.10558	8.37117	6.01226	8.17881	10.6011	6.18809	6.78679	7.61364	7.51705	11.3095	7.30024	9.91086	14.4089	13.6614	9.16362	8.66323	6.29125	6.34427	13.7719	5.99653	7.28345	7.79747	8.26673	7.34192	6.19125	7.97904	6.33168	6.93903
GSM907333	6.55003	11.7001	7.47183	11.7998	14.0127	7.32451	9.04334	8.27695	8.43478	13.8553	6.54815	7.0146	8.63708	8.10814	10.7191	6.10491	6.3191	7.84934	9.28253	7.90525	9.29135	8.54661	8.38011	6.19846	8.47224	11.2884	6.05914	6.52484	8.12586	7.39977	12.3608	7.02916	10.8139	14.5008	13.0538	10.3851	9.13549	7.04027	6.51531	13.8261	6.20453	7.7748	6.74082	8.06968	6.84715	6.1947	7.31015	6.45976	7.41319
GSM907334	6.90801	11.3331	7.04552	11.693	13.5544	7.67561	9.6221	8.20215	8.20231	13.3868	6.98229	7.86129	8.73296	7.67927	10.798	6.05101	6.42945	7.50381	8.50177	7.79711	9.79722	7.96631	8.36915	6.07789	8.57223	11.4903	5.74694	6.53996	7.89655	7.63971	12.3616	7.49386	10.8986	14.2979	13.4754	10.5711	9.43381	6.68143	6.52589	13.2887	6.28417	8.0562	6.39414	8.45418	7.18295	6.12144	8.13306	6.72727	7.21551
GSM907335	7.01845	10.794	7.04577	11.9274	13.0913	7.12259	9.34335	8.31502	9.03154	13.2202	7.01261	8.54648	7.89515	7.78922	10.2431	5.951	6.28764	7.28051	8.96259	8.27018	9.40095	7.23943	8.6547	6.24649	7.8872	10.8875	5.9033	6.98194	7.84475	7.16906	12.1975	7.40067	10.2172	14.0657	13.1517	10.4345	9.06723	6.7593	6.39017	12.8034	6.17596	8.08516	6.21215	8.20896	7.6143	6.07012	7.90461	6.72891	7.84343
GSM907336	6.79214	10.1155	7.26091	11.7493	13.7188	7.37074	9.53691	7.924	8.57679	13.315	6.60693	7.41943	8.51457	8.54999	10.4217	6.08248	6.58216	7.09498	9.17339	8.30732	9.70538	8.23723	8.41016	6.3293	8.38058	11.1273	6.16306	6.67972	7.81123	6.71515	12.4068	7.52791	10.3121	14.4437	13.2937	10.4134	9.43904	6.8036	6.54335	13.599	6.23019	7.80849	6.80141	7.79399	6.85023	6.06078	8.24314	6.52406	7.29734
GSM907337	6.33759	8.8651	6.75062	11.642	13.6179	7.39722	9.52009	8.04486	8.64722	13.2096	6.5023	7.55047	7.90626	8.44854	10.4376	6.13048	7.16145	7.40141	9.02724	7.84786	9.73841	8.34427	8.22456	6.37808	8.05913	10.6028	6.38857	6.4126	7.40283	6.22354	10.0298	7.28456	10.2719	14.1375	13.6011	10.379	9.30238	6.71983	6.56397	13.7905	6.13952	7.41569	8.58648	7.78708	7.08492	6.40266	8.31581	6.50477	7.59686
GSM907338	6.26751	8.35725	6.65625	11.9773	13.3839	9.53437	9.91406	8.22819	9.75052	12.9341	6.66174	9.34193	7.28456	6.83653	10.4383	5.97955	6.37936	7.60872	8.815	7.65319	8.50174	7.40302	8.9714	5.92725	7.0097	10.5779	6.51004	6.75237	7.03189	7.22493	10.287	7.36167	10.2666	15.0162	13.596	9.68498	9.07907	6.84493	6.38637	14.0639	6.14896	7.37405	7.23666	8.20141	7.35293	6.18578	8.82898	6.13173	7.57983
GSM907339	6.39635	9.10603	6.873	11.0687	13.9533	7.15165	9.64076	8.42565	8.1592	13.3856	6.2933	7.45412	8.39715	8.19374	10.7101	6.05943	6.37114	7.59702	8.86308	7.97857	9.08857	8.15335	8.24736	6.36477	7.37471	11.0073	6.54724	6.46832	7.63343	6.60158	10.2612	7.1713	10.519	14.5654	13.875	9.49168	8.46082	6.79708	6.44362	14.0798	6.16597	7.24194	7.04703	7.94227	6.66552	5.97883	7.03301	6.28905	7.31693
GSM907340	7.20247	11.3971	6.87548	11.6991	13.4117	7.29201	9.35851	7.96435	8.24119	13.6334	6.8725	7.47846	8.04833	8.39552	10.537	5.88275	6.19287	7.3713	8.90054	7.91531	9.55696	7.19178	8.29997	5.99627	8.6427	11.7936	5.76087	6.72287	7.7922	7.52133	12.0534	7.50125	10.7985	14.3425	13.2724	10.6403	9.78033	6.49029	6.65272	13.2175	6.23189	7.82591	6.24688	8.0841	7.66241	6.14717	7.28107	6.25425	7.8194
GSM907341	6.39167	8.10762	7.09038	12.0603	12.897	7.77068	9.35408	7.96929	9.3109	13.259	6.24472	9.26999	8.34383	7.98865	10.1319	5.99608	6.57683	7.6238	8.91721	7.88829	8.63326	7.96162	8.72193	6.13872	7.75221	10.4341	6.28414	6.95216	7.41763	7.30337	11.3305	7.30417	9.86152	14.4337	13.0239	10.3373	8.79952	6.83837	6.55265	14.2376	6.2432	6.9658	6.38613	7.89503	7.10994	6.0846	7.72705	6.46973	7.84455
GSM907342	6.49954	9.09056	6.88866	12.0708	13.2163	7.02416	9.37668	8.04492	8.9868	13.2257	6.52821	8.84812	7.93744	7.76394	10.0686	6.04776	6.65544	7.40346	9.06414	8.09486	8.95905	7.58615	8.42599	5.90672	7.66211	9.93048	6.31423	6.55112	7.66192	6.95334	12.101	7.40609	10.0483	14.2723	13.2226	10.2315	8.69057	7.24742	6.26014	13.7697	6.14053	7.72367	7.0868	8.1416	8.05778	6.04492	7.5279	6.40911	7.81461
GSM907343	6.89669	7.17731	6.50304	11.0454	13.13	7.35181	9.46918	8.31848	8.82612	13.161	6.90744	7.99532	7.85693	7.1553	9.50372	6.01795	6.86235	7.36871	8.33262	7.52478	9.09262	7.39368	8.36758	6.05455	7.94558	10.4752	6.63786	6.6078	7.02799	6.6378	10.2196	7.53962	10.0004	13.4298	14.0714	9.67844	9.19131	6.88797	6.33186	13.489	6.25933	8.24683	7.97244	8.14999	7.72766	6.44795	8.06975	6.48739	7.2047
GSM907344	7.37217	11.3623	6.83277	11.1009	13.523	8.24638	9.44404	8.26255	8.79687	13.1577	6.60158	6.8749	7.74739	7.66697	10.084	5.89485	6.09462	7.42496	8.56116	7.44457	8.92008	7.52295	8.76411	6.09978	8.66112	11.1072	5.89623	6.76135	8.23406	7.67547	11.8235	7.52827	9.44427	14.1168	13.1021	9.66065	9.00054	6.88099	6.35772	13.3627	6.16511	7.57877	6.33389	8.68575	7.74483	6.19471	9.3727	6.00279	6.7905
GSM907345	6.79118	10.1829	6.54041	11.7329	14.0797	7.25953	9.09575	8.20804	7.56977	13.6942	6.14457	8.60307	8.40795	8.18813	10.5431	6.06242	6.45132	7.89037	9.09579	8.37913	8.85387	10.0293	7.86541	6.22905	7.41666	11.5572	6.33903	6.55116	8.12935	7.76772	13.0277	7.15026	10.2412	14.888	13.0384	11.0768	8.97254	6.99561	6.39991	13.2214	6.30087	7.47651	6.42759	7.82511	6.63219	6.10275	8.89394	6.31593	7.85869
GSM907346	7.22911	9.28849	7.05774	11.6594	13.5285	7.05394	9.54863	8.31554	7.34565	13.6316	6.61089	8.18417	8.77635	8.33007	10.5076	6.11026	6.48176	7.50641	9.13555	7.94579	8.80111	10.1236	7.44953	6.04331	7.40767	10.8956	6.09104	6.93454	7.96406	7.3717	11.8781	6.98546	9.7806	14.1848	13.1788	10.319	9.03849	7.00245	6.48008	13.1845	6.02839	8.0452	6.10955	7.67205	6.94183	5.8895	8.97941	6.3167	7.17679
GSM907347	6.78921	9.27327	6.90646	11.4431	14.4864	7.17023	9.35896	8.2267	7.54321	13.9294	6.61316	8.21474	8.86559	8.5155	11.0325	6.08936	6.60085	7.38444	8.9555	7.81778	9.25867	10.1541	8.09992	5.96271	7.14675	11.462	6.60368	6.56004	7.79433	7.42028	12.7117	7.22378	10.1287	15.1058	13.0874	10.0481	8.84284	6.88523	6.20015	13.7815	6.15903	7.76684	6.48734	7.5945	6.53115	6.3257	8.8428	6.58261	7.54057
[truncated: 1,928 more columns]

## Sheet: WGCNA_genelist
TUBA3E
CEBPD
TUBA3C
ZFP36
RASD1
TUBA3D
CDC42EP4
SERPINA3
AXUD1
S100A9
MYH6
FCN3
MT1M
LYVE1
MAP3K6
PRKCD
CD163
YPEL2
S1PR3
C1R
FPR1
FCER1G
FKBP5
PIK3IP1
AP3M2
MYC
MT1X
S100A8
MAFB
CMTM7
SLA
JAK2
SCN2B
FES
DYRK1B
ZDHHC9
GALK1
PROS1
CHN1
NFKBIZ
C7ORF41
TIPARP
SLCO4A1
LOC653888
CORO1A
ALOX5
CTSC
SORBS2
CD97
XLKD1
STAT3
MT1A
PIM1
ARPC1B
IFITM2
HCK
EBI2
WAS
ITGB2
SMOC2
F13A1
CD248
RANGAP1
LCP1
IFITM3
SMYD2
HCLS1
SLCO2B1
IL18R1
BTG2
CHRDL2
MGST1
C10ORF71
IRX6
INPP1
IL13RA1
MGC42367
SAP18
CHST7
MFSD10
BCL6
LMOD2
NFKBIA
TUBB2C
LOC653879
C1QC
SLC15A3
MT2A
NNMT
CYBA
C1ORF162
C1QB
DOCK2
LAPTM5
ZNF415
HEG1
LRRC8A
CEBPB
CD14
FGD2
CD68
MBP
S100A10
MASP1
TKT
VAMP8
TSPYL2
TDRD9
SRGN
ALOX5AP
FRZB
IVNS1ABP
LILRA5
C14ORF132
FAM110B
SLC12A9
HAVCR2
GPR56
CCND2
CAPN1
MVP
LYPLAL1
OSR1
CD209
CYP2J2
IFI30
ACE2
SORBS1
DDIT3
ATPIF1
PRICKLE1
HES6
SEMA4B
M6PRBP1
C8ORF47
NKD2
GPR172A
KIAA1853
OSMR
TUBB
GNA15
ANKMY2
SELS
SDSL
HMGN2
C5ORF23
GRASP
YPEL1
LOC148915
SVIL
MAP3K8
MIDN
SGK
RASL11B
IRX2
PDE5A
MPP3
TUBA1B
PLCE1
VSIG4
FCGR2A
GFPT2
KIAA0141
DCUN1D3
DDIT4
LOC255783
LRRC49
SLC16A9
PLEK
DUSP1
IRAK3
ADAP2
SLC39A1
FGR
PLTP
MARCO
C1QTNF1
TRMT5
SLC7A1
CCDC28A
RARRES1
LOC730534
SERPINA5
SFRP1
C21ORF34
TOMM40
SLC47A1
SMAP2
BCL3
LTBR
DUSP23
TYROBP
CRYM
HOPX
DUSP26
PDIA3P
RGS4
MS4A7
CCND1
TUBA1C
SNRPB
DDOST
EDNRA
COL21A1
ECGF1
ERRFI1
METTL7B
PLEKHF1
PHLDB2
SH3BGRL3
C19ORF10
MS4A6A
FRMD5
LOC642031
DHX37
KLF6
SLC2A1
SEC61A1
ENO1
LOC201140
ATP1A2
EML3
TEAD4
KLHDC9
TBXAS1
GATM
TNFRSF1A
SERPINH1
ELL2
ARPC3
LOC387763
COL6A2
HYAL2
ATP1A1
GSDMD
LCN6
ZNF787
ZYX
RDH10
C5ORF41
FZD2
FKBP2
CYBB
ENDOGL1
PTPN11
DIO2
NDUFA4L2
GPR4
TMBIM1
GRM1
SYNPO2L
CHSY1
HEPH
AGXT2L1
NUP62CL
HTRA1
FKBP11
COL16A1
NAP1L3
DARC
NBPF20
HMGB2
LUM
PLA2G2A
VWC2
RRBP1
S100A13
HFE2
HGS
ECM2
EXTL1
CBX7
SLC35F1
C14ORF179
C5ORF46
KIAA0644
OKL38
APCDD1L
C1ORF142
HCST
C2ORF64
LOC728473
RGMA
C19ORF59
BTBD14A
ASAH1
LPCAT3
PLK2
KCNK12
KLHL34
CDR2L
STK38L
FBXO32
SERPINE1
LIN9
PLAU
CD59
ADCY3
LDHA
FAM107A
PKD1L2
RNASE2
FKSG30
PPP1R3C
TRAK2
MDFIC
CEL
OBFC2A
MTHFR
KTELC1
LOC285556
ACTB
EMILIN1
HSPA2
PRKCQ
AIF1
FYCO1
PDK4
TNNT1
ISG20
FCN1
KLF4
THBS4
PHGDH
MTE
RAC2
IFI16
IGSF5
TMEM140
TMEM74
SOX4
GPNMB
GLRB
C22ORF25
TPD52L1
ZNF189
CFD
OMD
PPP1R14B
GFOD1
CENPA
C14ORF135
TSPAN32
TM7SF2
S100A11
LOC401397
LOC399942
LYN
SGIP1
APOLD1
S100A12
ATP2A2
C10ORF110
KCNA5
RGS1
ID3
LOC648024
FRMD3
IER3
C13ORF15
EDC3
GARNL3
RNASE1
PDGFRB
SLC7A5
FAM46B
CLIC1
SOCS1
SNF1LK
TMCO3
USP46
TMEM56
LHFPL2
XPO4
CCL2
ARPC5L
ADFP
SOX18
CXCR7
ITPR3
GADD45G
ST8SIA5
PTHR1
TLL2
TAF15
NBPF10
ARHGDIA
LY96
LMCD1
PROM1
NINJ2
C9ORF24
ADAMTS9
LOC647000
CXCL2
MFN2
RBM20
SLC7A7
WARS
SPOCK1
PDGFRA
TIMP4
TUBA1A
SNCA
SFRP4
AQP9
FCGBP
MAP2K1
CPT1B
GABRB1
TGFBR3
RDH5
MLLT11
HLF
EIF4A1
DCUN1D2
CCDC109B
NPTX2
CLIC6
FLJ21986
PVR
TAP1
SLC16A3
TMEM71
LRRC32
PDE4D
FASN
MYH7B
SPPL2A
DPY19L2
NAMPT
PDE7A
CAP1
OXCT1
TMED9
IGFBP4
EMP3
RAMP1
TYRP1
DUSP28
SLC2A12
LOC650832
NPR3
KIAA1394
HLA-DRB4
MUM1L1
MTP18
LOC730525
S100A3
KLHL3
SSPN
ST8SIA2
LOC723972
LOC647346
KCNJ2
TRIB1
PLA2G4C
SCRN1
ITGB4BP
LDLR
FMOD
MATN2
SAT1
SERTAD1
TUBB4Q
LRRC39
SLITRK4
PRRX1
SPP1
GLDN
APOA1
LOC402221
COL7A1
CYP4B1
IHPK3
MYOZ3
ALDH5A1
GADD45A
SGCG
GJA1
WWC1
STS-1
MYOZ2
MT1G
IL17D
RGS2
OLFML2A
C20ORF26
ID1
TNFAIP8L3
ITGA5
ANKRD13A
ALPL
TPM3
DBC1
XBP1
PTDSS1
PICALM
SOX15
IFIT2
C20ORF177
SH3GL2
HSPA6
ATP1B3
SERPINB1
FOS
FAM129A
TMEM30B
ALDH1A3
RYR2
NP
FNDC1
MSX1
CTSK
KLF2
COL6A3
STXBP6
GPR22
BST2
LOC644760
CASQ1
RNF165
CA3
IFITM1
ANXA2
CMBL
IL8
CDKN1A
LOC196549
CRISPLD2
PROX1
SCD
MFAP4
IL1RL1
ATF3
SLC30A2
DKFZP564O0823
NME1
CTSG
C17ORF91
SOCS2
ACOX2
MAP4
VAT1L
LITAF
HBEGF
FLJ35258
IL6
TIMP1
ANXA5
LOC649143
APP
C21ORF7
LIPG
HIST1H2AC
IQCG
JUNB
MT1E
MXRA5
CORIN
IRF6
HAMP
LYZ
LOC100008589
GCOM1
KLHL24
PTPN1
SDF2L1
SLC2A3
IRX3
LOC652097
C3ORF52
BEX1
PXDNL
RABGAP1L
C1ORF188
AZGP1
SULF1
CD44
CYR61
LDB3
C1ORF117
ISG20L1
HEY2
MUSTN1
DPYSL4
TUBB6
GADD45B
TMEM158
TNC
RAB15
UCHL1
IFIT1
LAD1
COMP
AEBP1
AMY1C
PTPN3
MYL7
SLC38A2
THBS1
FSD2
DUSP5
KBTBD5
LEPREL1
TNNI3K
GUCA1C
LOC147804
HIPK2
TFRC
FGF18
XIRP1
PENK
SLCO2A1
THY1
CYP1B1
POSTN
APOE
CNN1
MYOT
EGR1
CPNE4
FOSB
ADH1A
XIRP2
FGF12
C6
NPPA
KLHL31
C14orf132
RNF207
SLC16A1
CKM
APOBEC2
PPIL1
SORT1
ATP8B1
SULF2
PLEKHA4
PCNXL4
HSPB7
SH3PXD2A
POLR2M
UNC5B
RTN4
RAB9B
ATXN1L
NUAK1
MKRN1
SCUBE2
GPD1L
PXDN
ACSS3
FGF7
FMR1
GAB2
SGCA
MYL3
VAMP3
SPTBN1
MPRIP
CXADR
B3GALT2
MLLT6
ISG20L2
RNASEH1
PSMA3
STARD13
PDE3A
RBFOX1
ANKH
TJP1
KIAA0226
FMNL3
TNNT2
SERINC3
TTYH2
PRDX6
CLGN
DCLK2
LRRC2
CTAGE5
MRPS9
UTP11L
TCP11L1
SRGAP1
NCAPD2
RAB11FIP3
AHNAK
GPT
FARSB
FAP
RAP2A
CBL
SMARCC2
MPI
WDR66
PAPSS1
HIBADH
PLXDC1
B3GALNT1
POLR2A
TMEM65
TNFRSF11B
ACAT1
HSD17B4
QPCT
RSAD1
PRR24
SH3BP5L
ABCC5
DLG5
C12orf39
ARHGEF12
BNIP3
KCTD17
MED7
KANK2
MFGE8
FBXO9
GON4L
KALRN
KMT2A
FSCN1
ARHGEF9
ZNF641
DGAT1
CYCS
DNM1L
ADRB1
B4GALNT3
MTIF3
MCAM
F2R
GCNT2
LDHB
PEAK1
MTURN
FAM179A
DPY19L2P4
RWDD1
SLC25A4
DECR1
PAG1
LINC00881
C14orf166
LAMA2
SCP2
ENAH
HSDL2
TERF2
ENO3
RABGAP1
MRPS31
SEC31A
BACE1
CHPT1
SBDSP1
ZNF384
PHF21A
COL12A1
ITIH5
COL4A1
AATF
ZFAND2A
TSLP
RTN4IP1
MRPS22
FAM213A
BCKDHB
AZIN1
ZNF621
LDHD
DHX38
PLXDC2
GSN
CXCR4
GRB10
C12orf49
PEBP4
KCTD11
DOCK1
STARD7
LPCAT4
MAOB
COPS5
LRRFIP2
GALNT2
MYLK3
ATG13
COQ2
EIF2AK3
CCAR2
MED13L
MAP1B
SLC4A3
CTDSP2
SIDT2
VOPP1
MFN1
AAED1
NDRG1
EP400
FXN
HIST3H2A
SLC17A5
MCCC2
LCLAT1
RGL1
RGS3
GATAD2B
RIC8B
PTRF
NAA15
ACSL3
SLC9A6
TNS3
ZADH2
FAHD1
TTC28
ITGB5
AUTS2
KCNC4
BSG
PTCHD3P1
GOT1
RHOT1
MZT2A
GSK3B
PDCD5
NID1
MTA2
NKX2-5
FBXW2
AZGP1P1
CASP3
TRMU
FAT4
SUCLA2
GTF2A1
MUT
CKB
PXDC1
PTPN14
DUSP16
STEAP2
ENTPD6
NOX4
RNF146
TRAPPC12
HMGN3
LBH
ALDOC
USP10
FBXW4
KDM6B
SH3RF2
IQCE
KCNE4
SH3RF3
LRP10
FKBP3
C11orf71
CACNB2
ACAA1
PRKCH
TTC9
KLHL2
BUD31
SLC38A1
ADAM11
SETD7
PTPRA
PTPN21
KCNIP2
ZNF532
TMEM69
SWAP70
DOCK4
PGAM2
KIAA0430
ITGA10
SMAD3
NDUFAF1
TANC2
HRC
PNKD
CTTNBP2NL
GLG1
FAM13C
CA14
NDUFAB1
MAP2K5
CRIM1
FAM124B
PPP2R5C
ZFHX3
EHD2
RUSC2
FAM13B
ARHGDIB
HMOX2
MRPL52
KIAA1462
CYTH2
PPP1R9B
ADHFE1
DCHS1
BAIAP2-AS1
FRY
FUT11
SHISA2
TUBB4B
TBC1D20
NUDT17
BRD3
ENDOG
PPP1R1C
GALNT10
GRB14
MAP4K4
GSS
MAGI1
DIRAS1
CPED1
CAMKK2
TSTD3
TAF9
GJA3
ELK3
KCTD9
AIFM1
RIIAD1
C1orf21
UCK2
TMEM120A
FLNB
ZBTB47
UCHL5
RHOQ
MB
PPAP2A
SNX29
IP6K1
PI4K2A
KIF13B
C15orf38
SLC5A1
PCMT1
SPATA17
CARS
GAS7
NT5DC1
LSM10
TRIO
SLC8A1
SMIM13
GTF3C6
GCC1
MAP1A
ETFDH
GSTM4
CLCN3
PMVK
TNFRSF19
PDHA1
PHKA2
ERG
FHIT
MTERFD1
UPF1
CREBBP
CALCOCO2
OSBPL2
SAR1B
ZBTB18
FNDC3B
FGD5-AS1
MMP28
LMBR1
VDAC2
INPP5F
HSDL1
RBM28
C1orf105
DUS1L
RBM3
DIXDC1
KCTD20
ANKRD6
NUPR1
ZNF623
SUPT6H
TGFB2
FAM98A
MOCS2
GRPEL1
NDUFAF4
FAM127A
CCNG2
NDUFAF2
YEATS2
GATAD2A
FOXO4
RHBDD1
FBXO18
ART3
RIN2
CDK2AP1
FHL2
SUSD2
TTF2
ASB8
PTPRE
ZBTB43
REEP5
NDFIP2
ORAOV1
ANO1
LOXL2
HSPG2
NCK2
PLA2G15
DTNBP1
KIF13A
NYNRIN
CRLF1
ENC1
MAML3
CLMP
PCCA
PEBP1
EIF2B3
NDUFA5
DIAPH1
AQP7P3
CCDC141
NRBF2
C1orf170
TPRKB
MAP3K7CL
ECI2
MICU2
MIR133A1
SLC39A9
SMCO4
GRIA3
ITPRIPL2
IFT140
SELENBP1
MAP3K3
SGPP2
THSD7A
HIGD1A
TM2D3
KIF21A
XRCC6BP1
RANBP3L
SNAPC2
ADCY6
R3HDM2
SPECC1L
TRAFD1
USP53
NCEH1
LYRM5
CDCA2
EPHA3
STAM
GDF10
NDUFAF6
NIPSNAP3B
TMEM126A
CTIF
BTBD7
ATP5A1
FAM210A
SRPRB
CYP4V2
BPGM
SH3RF1
COQ3
IPO5
EP300
ENOX2
CPNE5
EMP1
MAML2
TIMMDC1
ATAD1
RAI2
TATDN3
SPRYD3
EMC4
NUDT4
MEIS1
SIPA1L1
AMMECR1L
EPM2AIP1
PLXNA2
AGRN
AGTRAP
OTUD5
RAVER2
GZF1
SSUH2
DNMBP
COL5A2
XPO6
PACS1
SLC44A1
ROR1
MTMR11
SSC5D
ATP6V0E2
TLN1
PLIN5
SIAE
SUPT5H
DOK5
SH3D19
ALDH2
ZNF423
GOSR2
SAE1
ATP1B1
CKMT2
ME3
CDC42BPB
CBX6
ROGDI
TMEM184B
TIFA
RBPMS
USP22
FYN
KRT8
FBXL17
PPP2R5A
DAZAP2
MYO1E
NDE1
FITM1
FARP1
C9orf129
KIAA0556
QDPR
NAV2
BDH1
KGFLP1
NAAA
GALNT18
KIF3B
PPP1R26
KARS
SNTB1
OLA1
RHOBTB1
TBC1D9
BRD1
SNX8
TNIP1
ZC3HC1
C14orf142
ZNF618
HADHB
WWP2
VASH1
RTN3
FAM214B
DNAJC19
PXMP2
NDUFA12
SHB
OTUD7B
SCOC
AJUBA
ETFB
LTBP2
XRCC6
ACACB
PIK3CA
APBB2
CD9
DAPK3
HIPK1
HIP1
KDM5B
CACYBP
TGFB3
ORAI3
SMURF1
MRPL50
SYT17
WWTR1
SYNPO
TMEM38B
NUP188
ECT2L
MDH2
DPCD
TGFB1
ACOX3
EXT2
PAFAH2
DOK6
SAMD4A
NKIRAS1
TCEA3
ZNF778
SNED1
NEURL1B
CACNA2D3
UBE2Q2
CDK8
LSM12
LIMK2
HEYL
SFT2D2
FUNDC2
EFTUD1
ANGPTL5
CTHRC1
IGFBP5
CEP68
SMCR8
CAP2
HOOK3
LRP5
LAMB1
MAPKAPK3
DLEU1
DCBLD2
DGKH
EIF3D
UBE2H
MRPL1
ACSF2
RBMS2
SEC23B
RGS9BP
BCL11A
MLF1
FKBP9
NDUFV2
ELF1
PDLIM5
LOC100126784
LYRM7
TMEM205
ATL3
GLI3
GNPAT
SPEN
CLIP2
METTL17
C11orf24
ABTB2
EFCAB14
CRTC3
PAIP2B
HPR
RALGAPA2
CENPB
VBP1
KCNJ8
TRIM41
ERC1
PECAM1
AAMDC
ZNF330
OCIAD1
MIB2
SLC12A4
HOOK1
FAM185A
YPEL3
INPP5K
TMED3
SGCD
ZDHHC3
TRAF3IP1
WIPF3
RGN
ZNF704
CLIP4
GPD2
POM121C
SPAG7
NHSL2
CTSF
GPN3
TESC
LINC00963
MED25
IFFO2
RUNX2
MAST2
MTX2
PTPRD
SPG7
STRIP2
ACSS2
SERPINE2
TGOLN2
PFKM
NFU1
NAGPA
FGFBP2
ZNF317
ABCD3
SUCLG1
KLHL29
HDHD3
SIRPA
RALA
BCAT2
GALNT16
HP1BP3
SNRNP27
LINC00294
FBXO38
MAMLD1
NCR3LG1
VSNL1
C11orf95
MMP15
CLIP3
MRPS36
ARHGEF17
UCK1
TARSL2
ERMAP
FEM1B
42255
FCF1
FAHD2A
BLVRB
DDR1
CERCAM
FIBIN
MON1B
GPR107
SP1
RPF2
AKR1C1
PXN
GPC6
NSD1
MYEOV2
BROX
LGALS3
CHD3
KIDINS220
COL4A2
PCDH12
ZKSCAN1
VPS33A
TTLL7
MEIS2
KIAA1279
CHDH
RAB5C
CUX1
C15orf41
RAB6B
CMKLR1
DBNDD2
PITPNA-AS1
NRDE2
PREX2
PDGFRL
ATP1A3
C5orf15
ABCG2
NEU3
LEFTY2
NUMA1
TMEM67
HIST2H2BC
AFF3
SRGAP2C
ACN9
BLVRA
ADSSL1
HSPB3
LASP1
PTPLB
RGS6
LACTB
SYNJ2
FKBP4
FOXS1
TSPAN7
SNX1
STX2
ASB18
MCM7
ZNF639
EXT1
AGK
IDH2
MZT2B
SUOX
NT5C2
KANSL3
MECP2
ALPK2
FAM129B
PDHB
PPFIA4
CYB5A
NUTM2A-AS1
PLGRKT
FCER1A
ADAMTSL3
AMOTL1
C3orf70
STRADB
ANGPTL1
ZNF609
ADAM19
EFHD1
DTWD2
TP53BP2
KIAA1161
NAV3
SEZ6L
TAZ
ATP5G1
WDFY3
RAP1GAP
GCDH
NOTCH2
SLC39A10
LEPREL2
WTIP
TBC1D2B
42249
LTBP4
DNAJC25
LOC286297
TMEM178A
HRSP12
EGF
AXL
NDUFB6
PRR16
ANKRD1
MALL
ZC2HC1C
BICD1
WBP11
LTBP3
TBC1D17
GTPBP8
TRIM35
DDX23
MAN2A1
AIG1
THOC7
PTGR2
DYNC1LI2
MPC2
KIAA1715
MPPED2
CEP104
MTMR3
OGFRL1
INCENP
ELMO1
CYTH3
COL8A1
MAPK12
MTRF1
NTHL1
MICALL1
CLCN4
C10orf71
NUP214
AFF4
TAMM41
CYB561D1
RBMS3
GPR34
HTT
IMPACT
MAPK1IP1L
ATF6B
CYB5R3
ACOT8
ITGB1BP2
WNK2
BMP2K
ARID1B
MYH9
NDUFC1
PLD6
NADK2
MASTL
FBXL19
ADC
PTPN9
PIK3CG
ARAP1
SNRK
MRS2
SLMO2
MRPS18A
CSNK1A1P1
RAB3A
MIF4GD
SERPINF1
RNF214
FH
PCDHGB8P
IZUMO4
ETNPPL
DPYSL3
MAFK
F2RL1
ISLR
PPM1D
LSM2
KCNN3
MAML1
KIAA1191
RECK
RHOA
FRK
BOC
FN1
EZH1
PLIN4
NADK
LAPTM4B
PLVAP
HIVEP2
DPF3
ZC3H4
TXNRD1
TIMM21
ATP7A
LOC220729
CHCHD7
GINS2
MESDC1
SPTLC2
GLTSCR1L
C22orf39
EVI5
YKT6
PMS2P1
SORCS1
42258
DVL3
AGBL5
RNF4
MRPL35
UNC13B
NEBL
TADA3
ARF3
ZSCAN20
PIK3R6
EIF3B
AQP7
LOC642852
BCL2
STAT5B
FGD5
CLSTN1
DIRAS3
ZMIZ1
ELK1
PPID
FAM227B
BANCR
MME
USP34
PHLDB1
AASDHPPT
TGFBR3L
AQP7P1
VANGL1
WIPF1
RNF115
DHX40
HAPLN1
CA5B
THEM4
KCNJ4
NLGN4X
LRRC41
SLC30A3
MTMR12
KIAA0753
BOD1
CHSY3
ANKRD36BP1
SPRY4
42069
CYLD
CD93
ABCC1
TMEM41B
MAP2
SPSB1
ENKD1
RBM24
CYC1
GPR155
SCAMP3
COX16
DESI1
TBC1D16
GNAQ
ACTN1
MLH1
ATG3
ZNFX1
ULK2
SMARCA1
CSGALNACT2
AKT1
EFHC2
SKI
RAB11FIP5
ADK
YWHAQ
SGTB
NPC1
FDX1
HELZ
SEC16A
KIAA1456
ATP5G2
MRPL3
KIAA2013
COX5A
KCNAB1
PLEKHA7
RELA
ARID2
RAP1GAP2
ZBED6
RABAC1
MSN
ARID5B
UBA2
APOO
KMT2C
VDAC1
EXOC6B
BMP8A
SNRNP200
TRIM44
CKAP4
CEP85L
METTL15
LAPTM4A
TIMM50
CACNA2D1
ULK1
RAB35
C10orf2
42074
COL27A1
PAQR9
CNN3
ITFG3
UBQLN2
RAD21
NARS2
ZMPSTE24
SPTAN1
CARS2
CNTNAP3
LYRM1
PPP2R2A
SPRYD7
TOR1AIP1
TRPM7
ARHGAP24
LINC00997
HECTD2
FAM219B
C1orf198
TBX5
NDUFC2
GPI
PTDSS2
PRELP
CCDC6
FAM107B
ABHD10
BIRC3
SAMD12
SMPD1
KLHL12
MGP
KIF3C
GPR133
PPP2R3B
HDGFRP2
ARHGEF28
DCTN1
SMG6
A2M-AS1
KCNT1
TLE4
UQCRC1
COPZ2
ATP2B4
URB1
SMURF2
PHACTR1
CHST3
UBR3
SHMT2
PLXNB2
CAMSAP2
GFOD2
NDC80
WDR45B
DPH6
CRIP2
NR4A3
CCL11
SLC29A2
MRPL16
PRKRA
PIAS2
ZEB1
GATS
PID1
PRICKLE2
PPP1R18
LONP1
PCNXL3
COQ9
SEL1L3
GOLIM4
CTSB
TP53
COPS3
PLA2R1
MINOS1
NDUFB9
SIN3A
MLIP
MITF
CTBS
OXCT2
TST
IGF1
PSMC2
NUDT9
PTPRR
LRRC16A
PLEKHM1
STAU2
DLGAP4
NDUFB5
ZNF646
KLF5
DHX8
POPDC2
B3GNT1
SPARC
RFK
MDH1
FBN1
SPECC1
TMEM116
TARS
HDAC4
TES
RALGPS2
PURB
SERTAD4
WEE1
NDUFS6
IPO9
GNPTG
ZNF79
VDAC3
IGFBP7
CAMK2A
TKTL1
CCDC136
F2RL2
EIF4ENIF1
CREB3L2
RILP
NDUFS2
DPY19L2P1
TCP1
LDB1
ZFP1
PANK3
TSEN15
OMA1
SAMD10
TMEM99
SYNRG
CD2BP2
GOLGA3
CNPY4
TBCC
TMEM63B
SNN
ATXN7
ATXN7L1
KIAA1429
ADCY4
CCDC9
ARHGEF2
PIGG
MYO1D
DOK7
TMEM26
XPO7
BAG5
ENTPD1
KIAA1324L
PALM
SLMAP
TRIM27
PGAP1
CHCHD10
LRSAM1
TTC23
FAT1
FBXW11
DUS4L
INPP4B
STX6
SPRED2
ALDOA
DDX42
BLMH
CCBL1
MARK3
CUL7
CHAF1A
ST6GALNAC6
SLC44A2
PKD2
PIAS3
SYT11
NRARP
FASTKD1
DAAM2
ABI1
KAL1
CALCRL
ITGB4
CTNNB1
SYTL5
ZMYND11
ADAMTSL4
ARHGAP35
PLEKHH1
AGO4
FIGF
TLE3
HNRNPUL1
B3GALNT2
SDHA
LRRK1
NOL7
EIF3K
ZNF528
DBN1
ARL13B
RAPGEF1
PIFO
SH3KBP1
ANO5
BAG1
DCTD
ATAD3A
EHMT1
C7orf26
MTRF1L
MXD4
SCUBE3
TAX1BP1
DCAF7
ARMC7
TTLL11
TNRC6C-AS1
CMIP
EHHADH
CYB5D2
ABCA6
FAM188A
KDM3B
C17orf103
LRP3
ASB1
METTL16
COPA
TPPP3
UBR5
TPRG1L
DICER1
ATP13A2
ITGA9
PARVA
TSPAN5
RAPGEF5
ARHGEF18
NDUFB3
ORMDL3
YWHAH
NDUFV1
ARHGAP1
VPS41
SGPL1
PPP1R1A
ERAL1
GOLGA2
PAK1IP1
DSCR3
PET112
PLEKHH2
SLC30A1
PPM1F
HDAC3
ACAA2
CTGF
SLC4A5
SASH1
KLHL7
PMPCB
CDH11
MFF
USP14
SOX7
ST3GAL2
CIC
ZCCHC14
SLIT2
F8
CANT1
TULP4
UBXN8
SNRNP35
BCO2
DIS3L
EVA1B
KCTD7
CMTR1
JAM2
BCAS2
SHC1
MIR4435-1HG
STARD9
TRIM8
SMTNL2
COL18A1
SUMF1
UQCRFS1
BRSK1
MRPL38
IQGAP2
MARS2
RNF152
SETD1B
TIMP2
C19orf25
PKIG
GTF3C4
UQCRB
GCFC2
DNAAF2
UBTF
FAM92A1
ASB15
HNRNPLL
ARL1
TRAF7
ZNF354C
DEAF1
CHGB
MAPRE2
RMI1
FAM172A
COMMD3
TMEM27
ATP5O
HAAO
ITGB1
RBM33
NDUFV3
CCDC41
PLEKHB1
ZC3H12A
[truncated: 239 more rows]
